# Supplementary material for: One-pot synthesis of polyfunctionalized quinolines via a copper-catalyzed tandem cyclization
Source: Royal Society of Chemistry journal article supplement (doi:10.1039/c8ob02078g), 2018-01-01

**Supporting Information**  
**For**  
**One-Pot Synthesis of Polyfunctionalized Quinolines *via* a Copper-  
Catalyzed Tandem Cyclization**

Dianpeng Chen,\* Xuejun Sun, Yingying Shan,\* and Jinmao You\*

The Key Laboratory of Life-Organic Analysis and Key Laboratory of Pharmaceutical

Intermediates and Analysis of Natural Medicine, School of Chemistry and Chemical Engineering,

Qufu Normal University, Qufu 273165, Shandong, China. E-mail: chendp@zju.edu.cn; shanyying@zju.edu.cn;

Jmyou6304@163.com

---

**Table of contents**

|                                                                      |           |
|----------------------------------------------------------------------|-----------|
| <b>General procedure for synthesis of substrates</b>                 | <b>P2</b> |
| <b>General procedure for the reaction</b>                            | <b>P4</b> |
| <b>The <sup>1</sup>H and <sup>13</sup>C NMR spectra of compounds</b> | <b>P4</b> |

## 1. General procedure for substrates

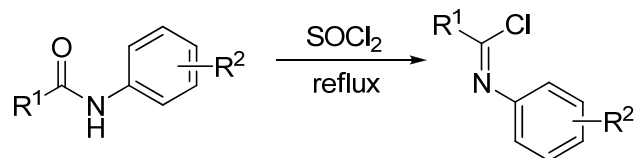

The amide (1.0 mmol) was added to  $\text{SOCl}_2$  (2 mL, 27.5 mmol) at room temperature under a  $\text{N}_2$  atmosphere. Then, the resulting solution was heated to reflux for 2 hours. Corresponding imidoyl chloride was obtained by the removal of excessive  $\text{SOCl}_2$ , and the crude product could be directly used in the next step.

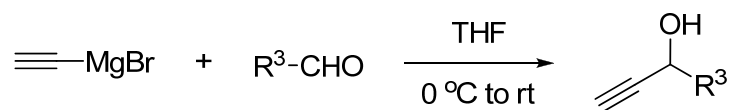

To a solution of the aldehyde (5 mmol) in dry THF (5 mL) was added ethynylmagnesium bromide (6 mmol) at 0 °C under  $\text{N}_2$  atmosphere. The resulting solution was stirred for 1 hour at room temperature. The reaction was monitored by TLC, and then quenched by adding 20 mL water and extracted with ether ( $3 \times 10$  mL). The combined organics were dried over anhydrous  $\text{Na}_2\text{SO}_4$ . After removal of solvent the residue, left was purified by flash column chromatography with silica gel using mixture of petroleum ether and ethyl acetate to give the title substrates.

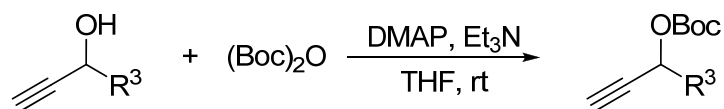

A mixture of  $(\text{Boc})_2\text{O}$  (5 mmol),  $\text{Et}_3\text{N}$  (6 mmol) and DMAP (1 mmol) in THF (10 mL) were stirred at room temperature, followed by dropwise addition of the propargyl alcohol derivative (4 mmol). The reaction was monitored by TLC, and then quenched with aqueous  $\text{NH}_4\text{Cl}$  (20 mL) and extracted with ether ( $3 \times 10$  mL). The organic phase was washed with brine after which it was dried over anhydrous  $\text{Na}_2\text{SO}_4$ , filtered and evaporated under reduced pressure. The crude product was purified by flash column chromatography on silica gel to give the title substrates.

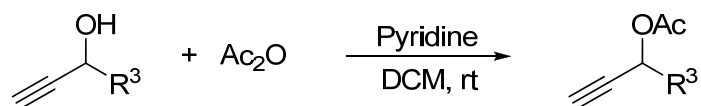

To a solution of the propargyl alcohol derivative (4 mmol) in DCM (10 mL) was added pyridine (6 mmol) and acetic anhydride (5 mmol) at room temperature, and stirring was continued for 1 h. The reaction mixture was diluted with aqueous  $\text{NH}_4\text{Cl}$  (20 mL) and extracted with ether ( $3 \times 10$  mL). The combined organics were dried over anhydrous  $\text{Na}_2\text{SO}_4$ . The crude product was purified by flash column chromatography on silica gel to give the title substrates.

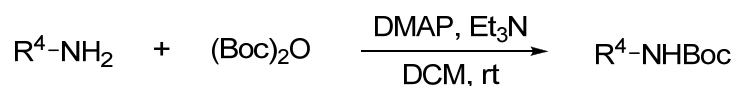

A mixture of amine (10 mmol),  $\text{Et}_3\text{N}$  (15 mmol) and DMAP (1 mmol) in DCM (20 mL) were stirred at room temperature, followed by dropwise addition of the  $(\text{Boc})_2\text{O}$  (12 mmol). The resulting solution was stirred for 6 hours, and then quenched with aqueous  $\text{NH}_4\text{Cl}$  (20 mL) and extracted with ether ( $3 \times 10$  mL). The organic phase was washed with brine after which it was dried over anhydrous  $\text{Na}_2\text{SO}_4$ , filtered and evaporated under reduced pressure. The crude product was purified by flash column chromatography on silica gel to give the title substrates.

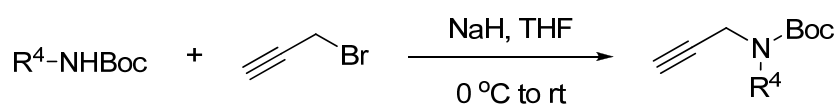

Sodium hydride (6 mmol, 60% in mineral oil) was added to a solution of substrates (5 mmol) in dry THF (10 mL) at  $0^\circ\text{C}$ . The resulting mixture was stirred for 30 minutes at room temperature. Then, propargyl bromide (6 mmol) in dry THF (5 mL) was added slowly at  $0^\circ\text{C}$  and the solution was stirred for 2 h at room temperature. The reaction was monitored by TLC, and then quenched by adding 20 mL water and extracted with ether ( $3 \times 10$  mL). The combined organics were dried over anhydrous  $\text{Na}_2\text{SO}_4$ . After removal of solvent the residue, left was purified by flash column

chromatography with silica gel using mixture of petroleum ether and ethyl acetate to give the title substrates.

## 2. General procedure for the reaction

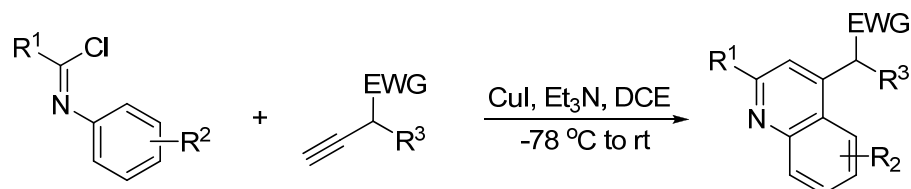

Under nitrogen condition, CuI (0.05 mmol) was successively added to a 25mL vial equipped with a stir bar at  $-78^{\circ}\text{C}$ . A solution of the imidoyl chloride (0.5 mmol) in DCE (2 mL) was added using a syringe. Then, the corresponding alkyne (0.6 mmol) was added to the mixture. Et<sub>3</sub>N (0.75 mmol) was added at last. The reaction was stirred for 30 minutes at  $-78^{\circ}\text{C}$ , and stirred for another 12 hours at room temperature. Solvent was removed in vacuoto leave a crude mixture, which is purified by silica gel column chromatography to afford pure product.

## 3. The <sup>1</sup>H and <sup>13</sup>C NMR spectra of compounds

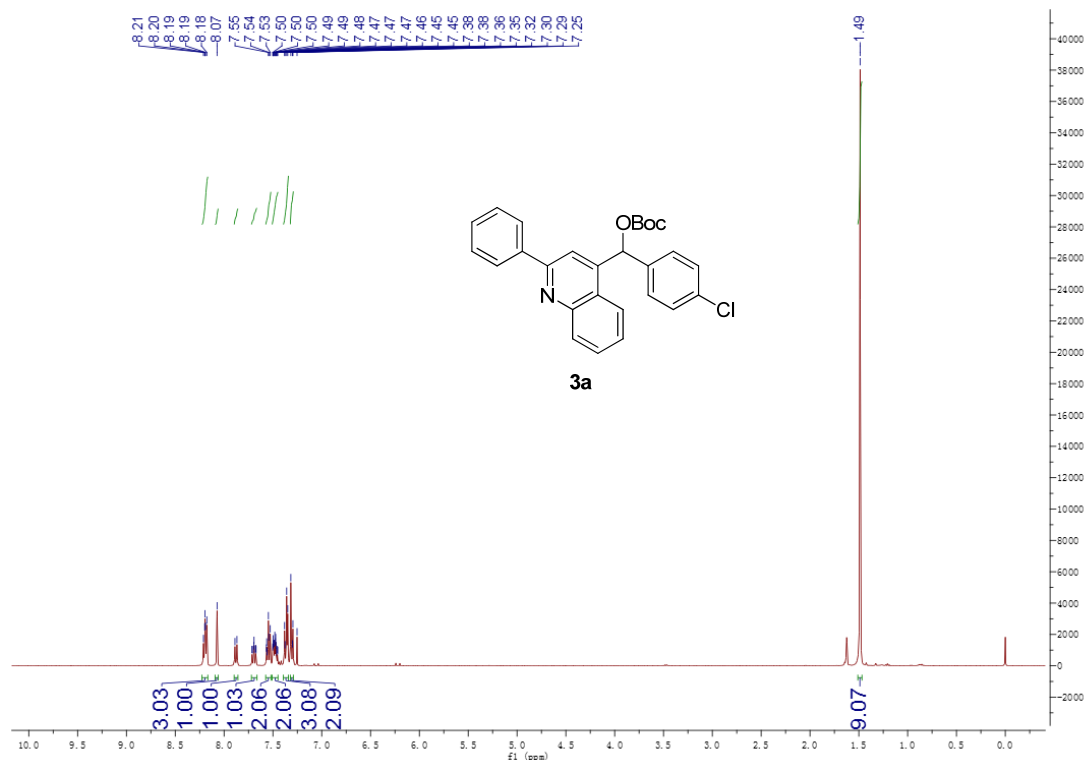

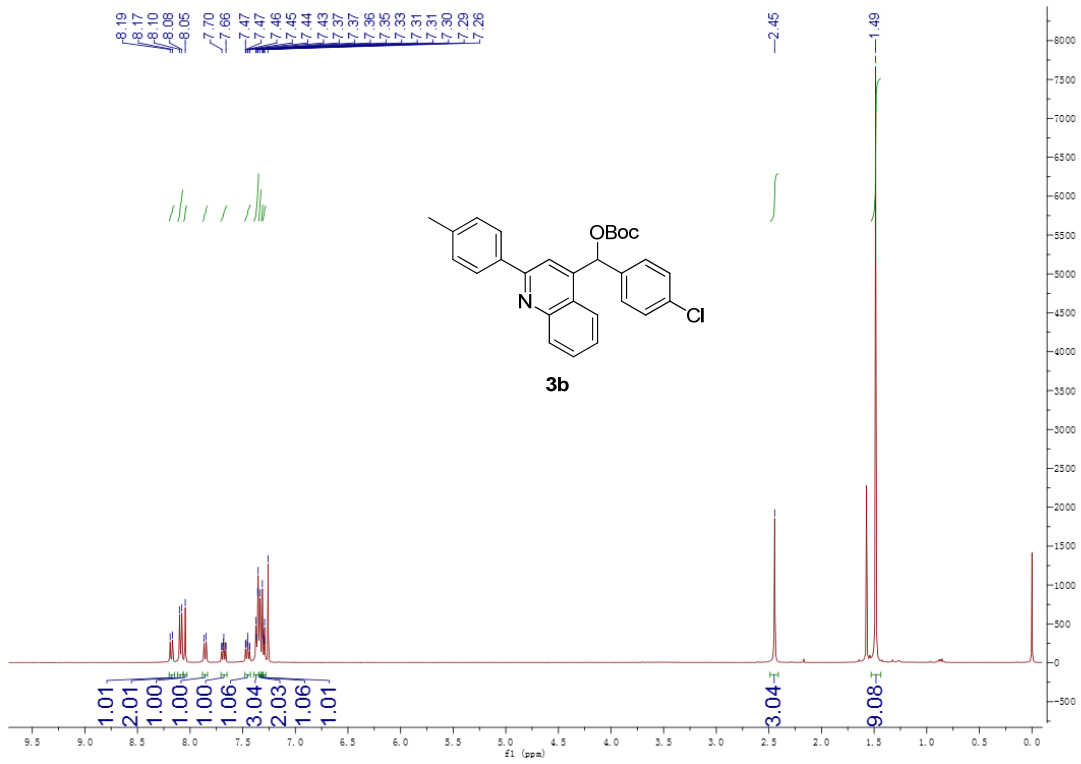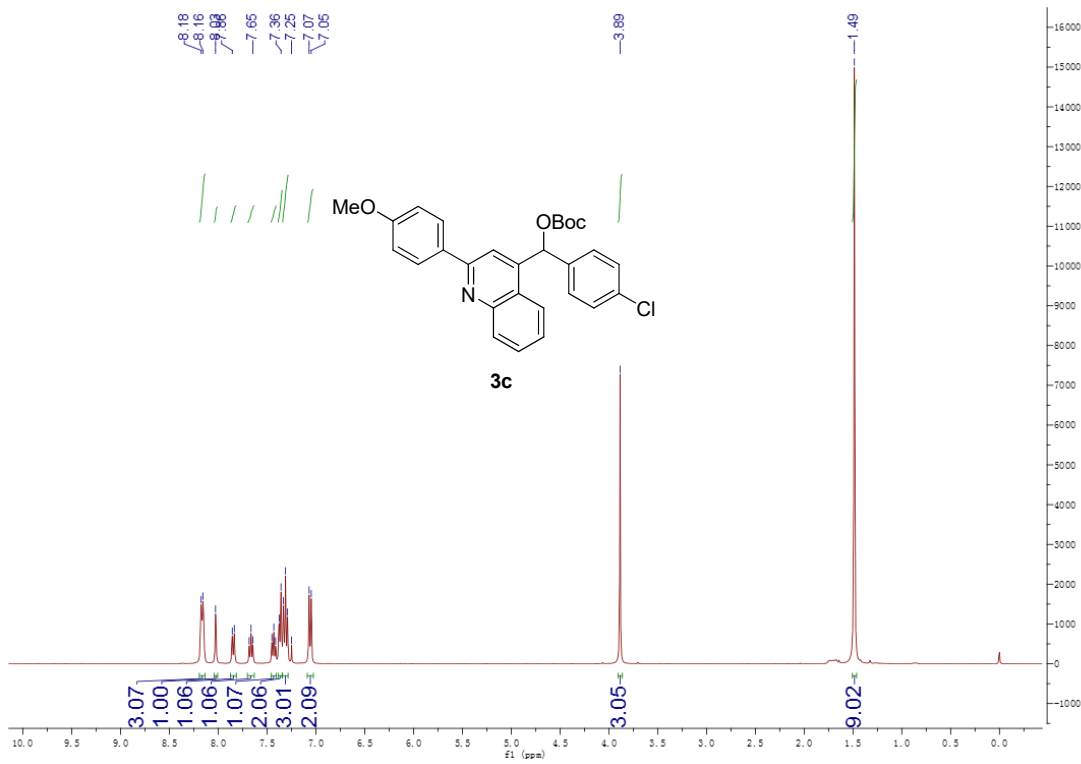

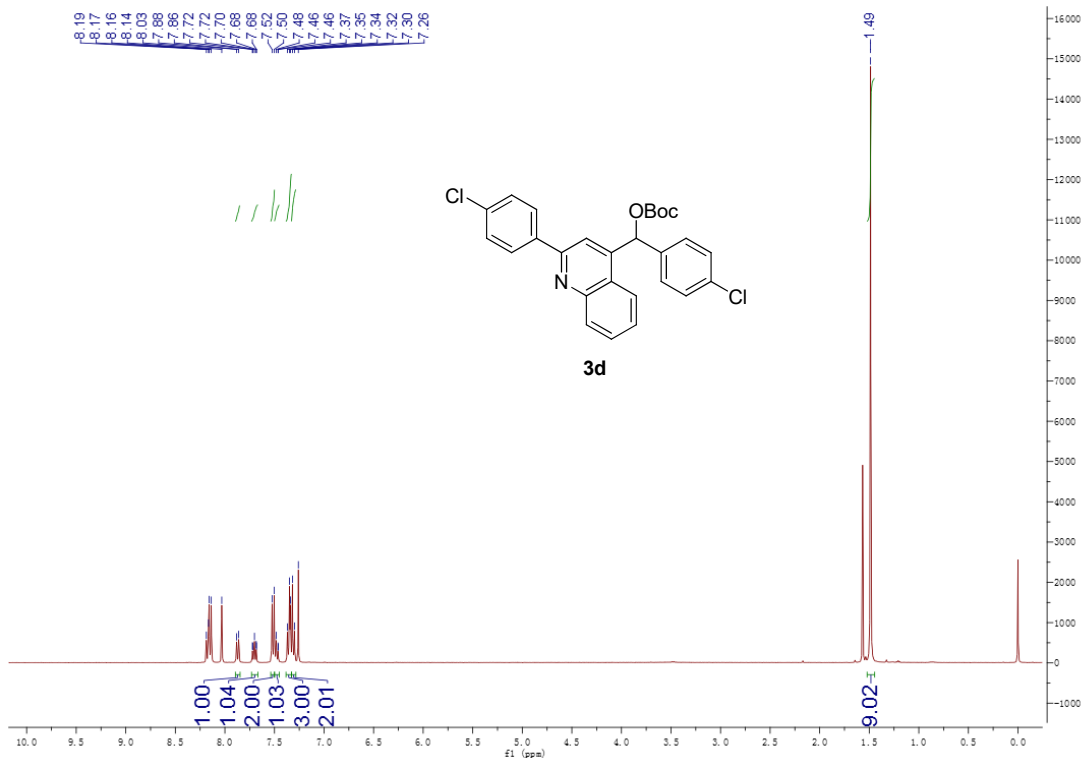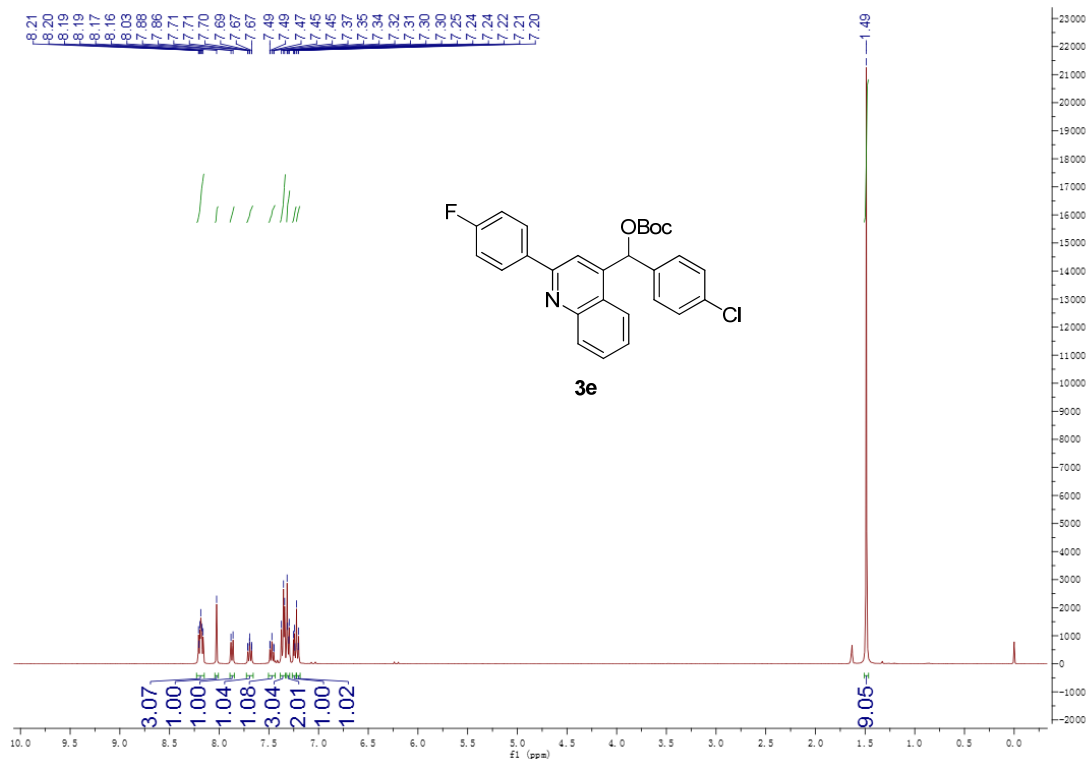

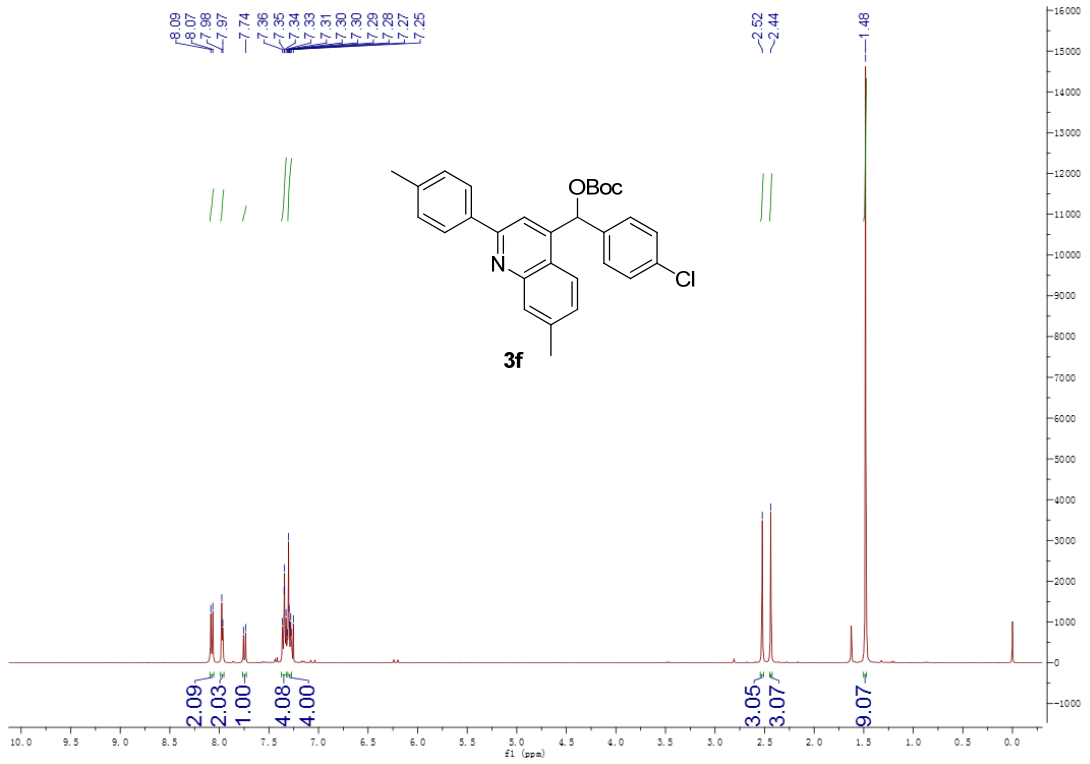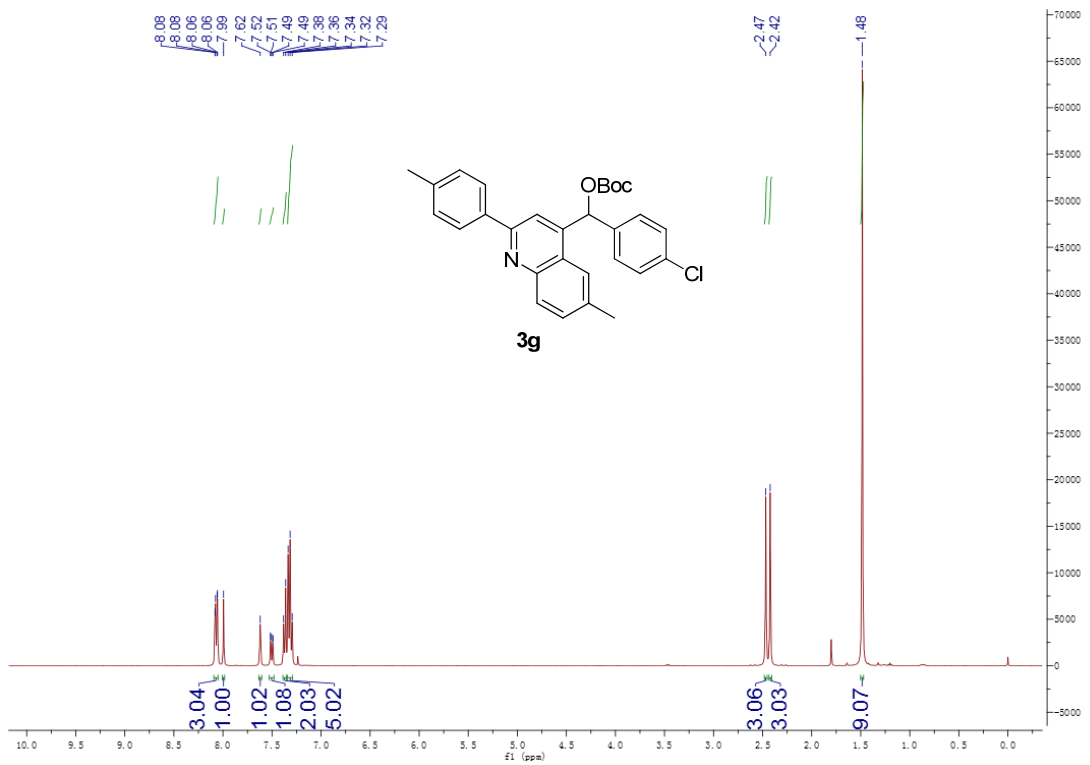

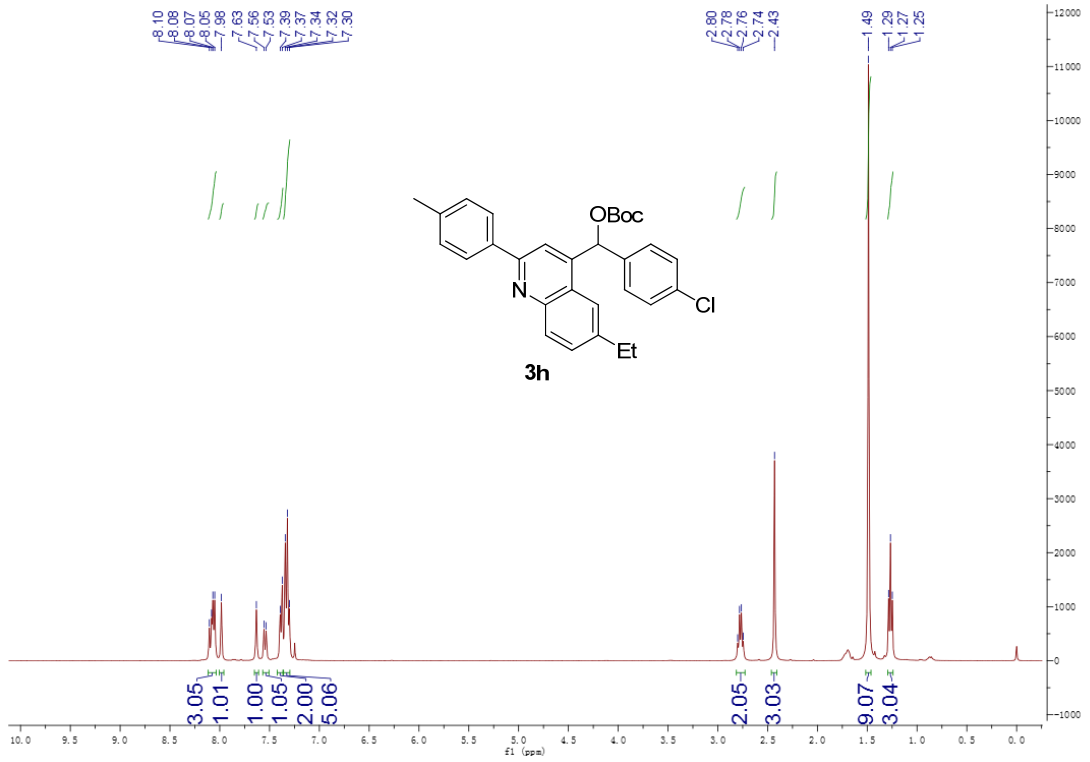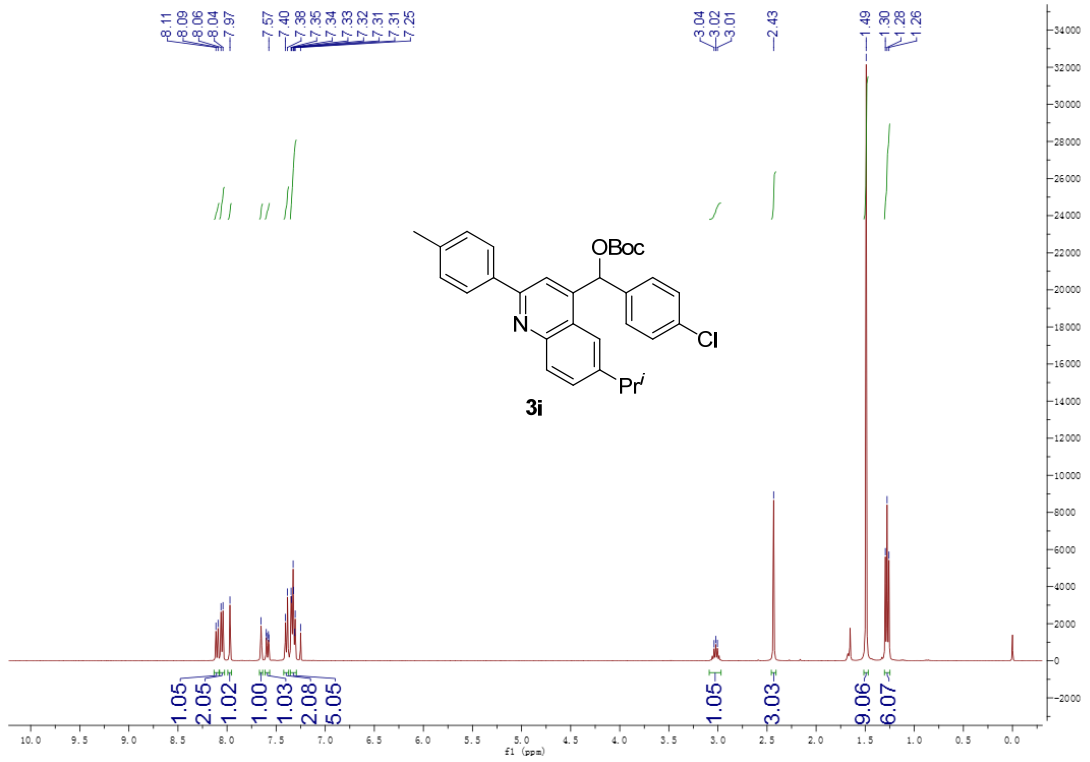



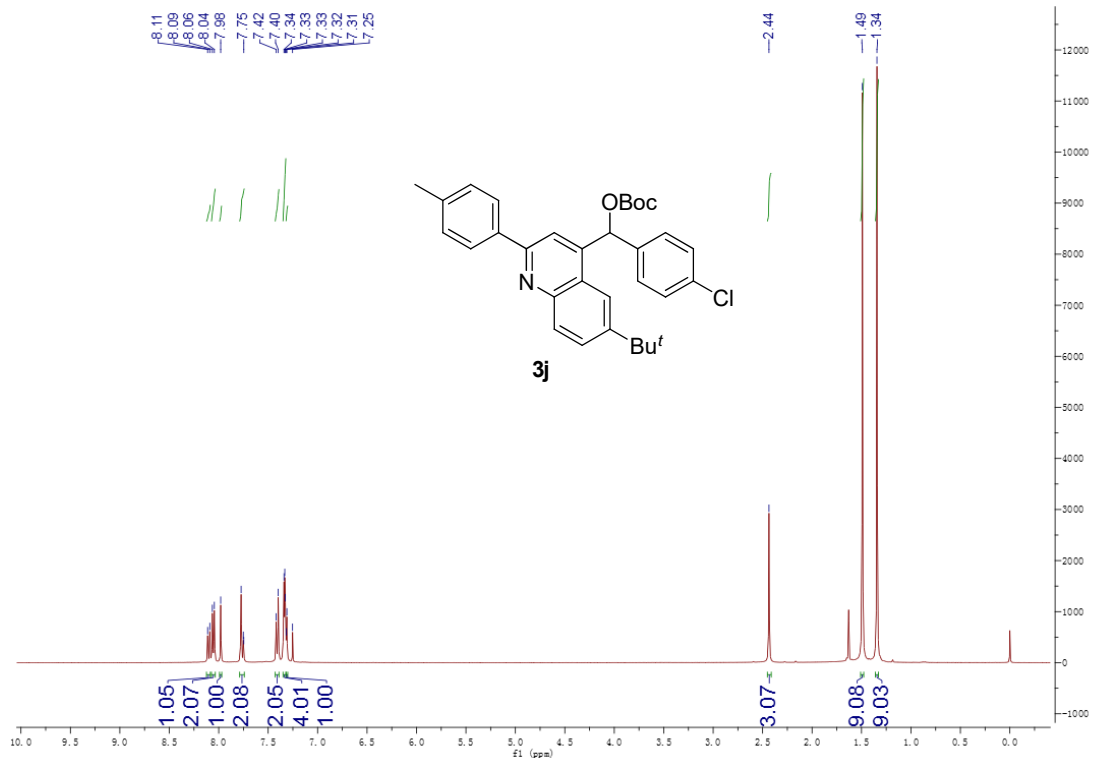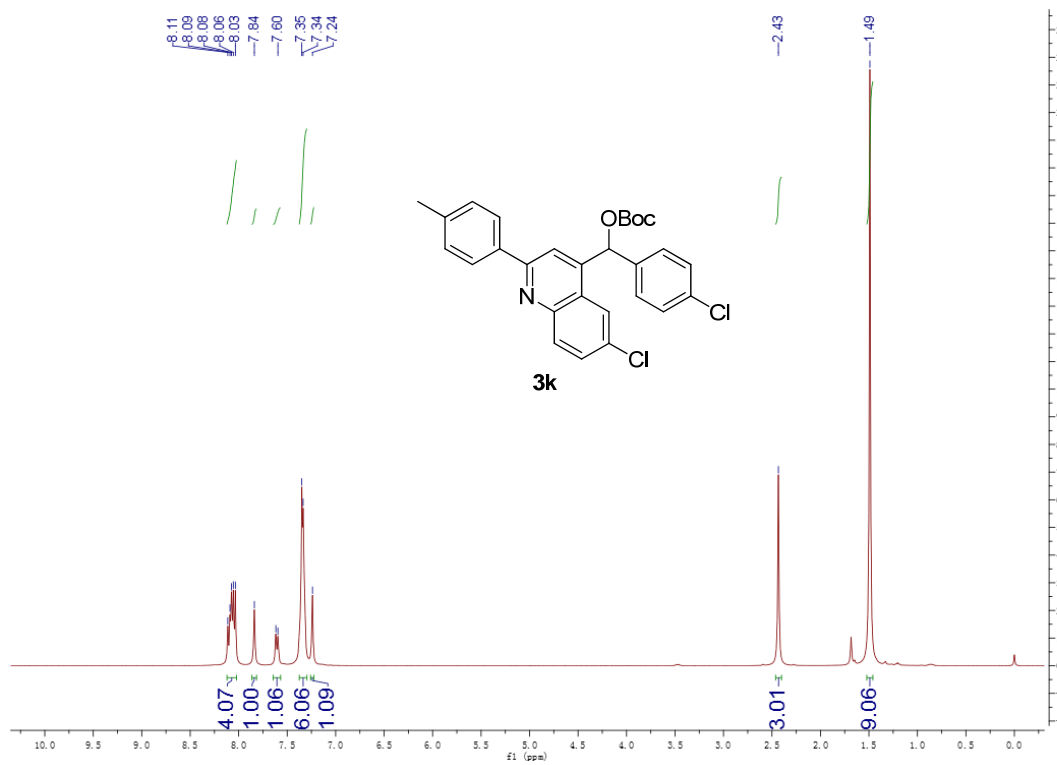

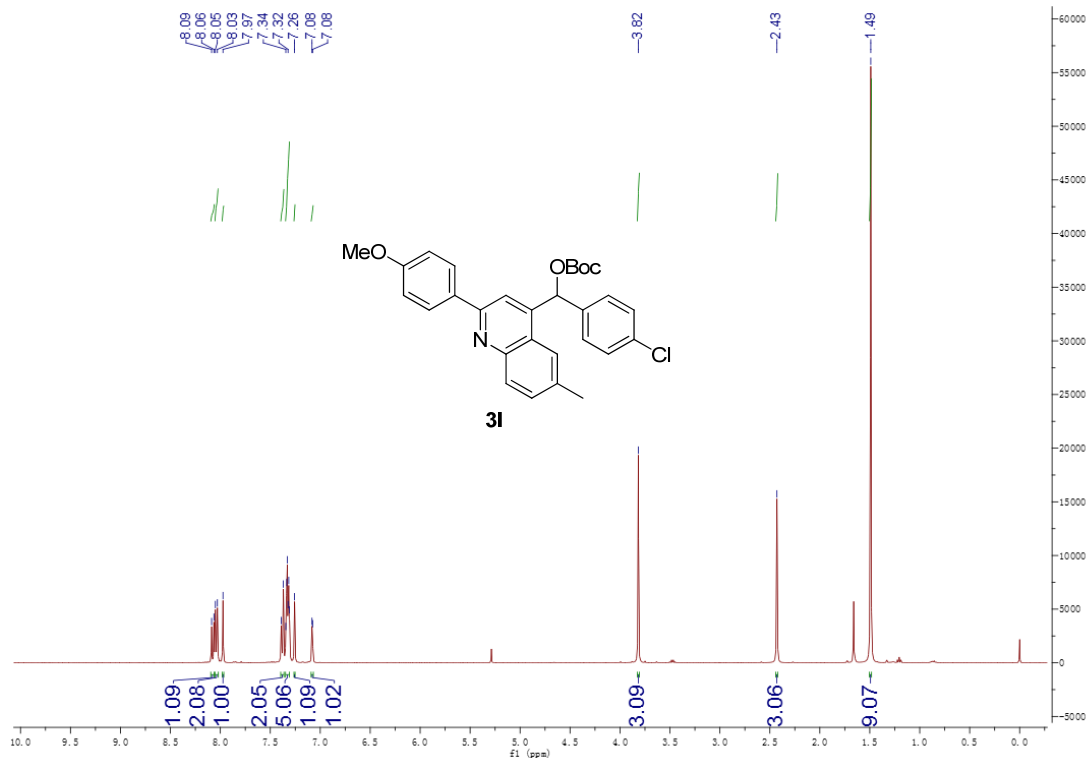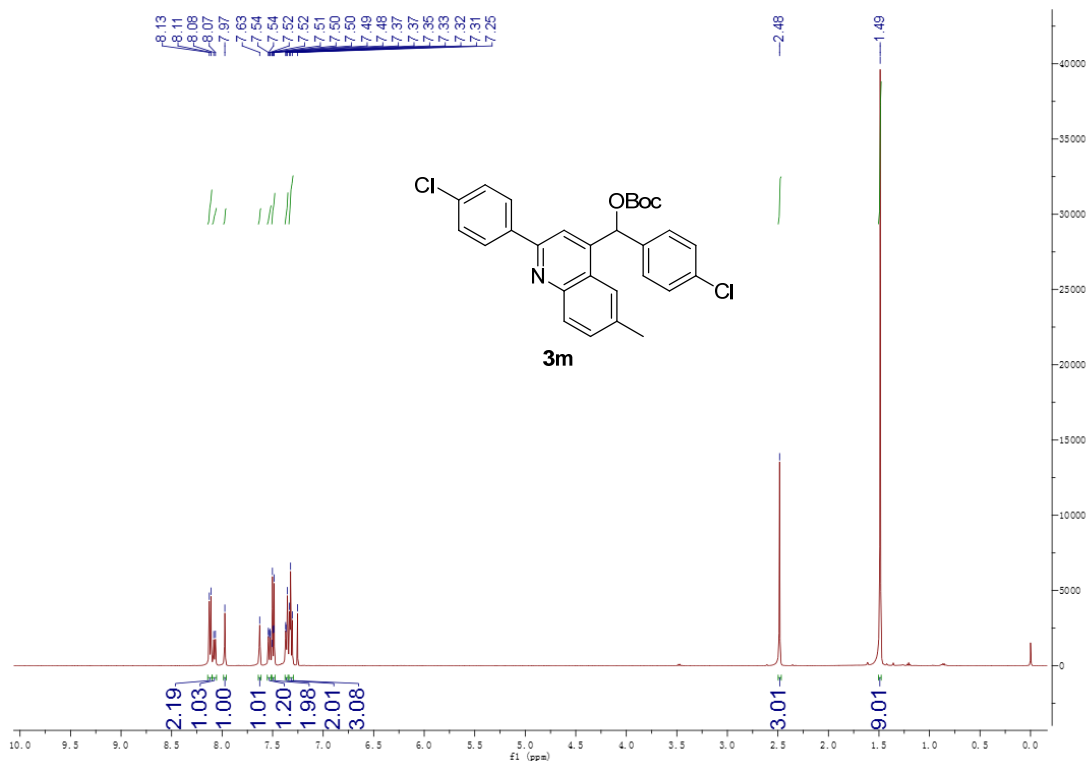

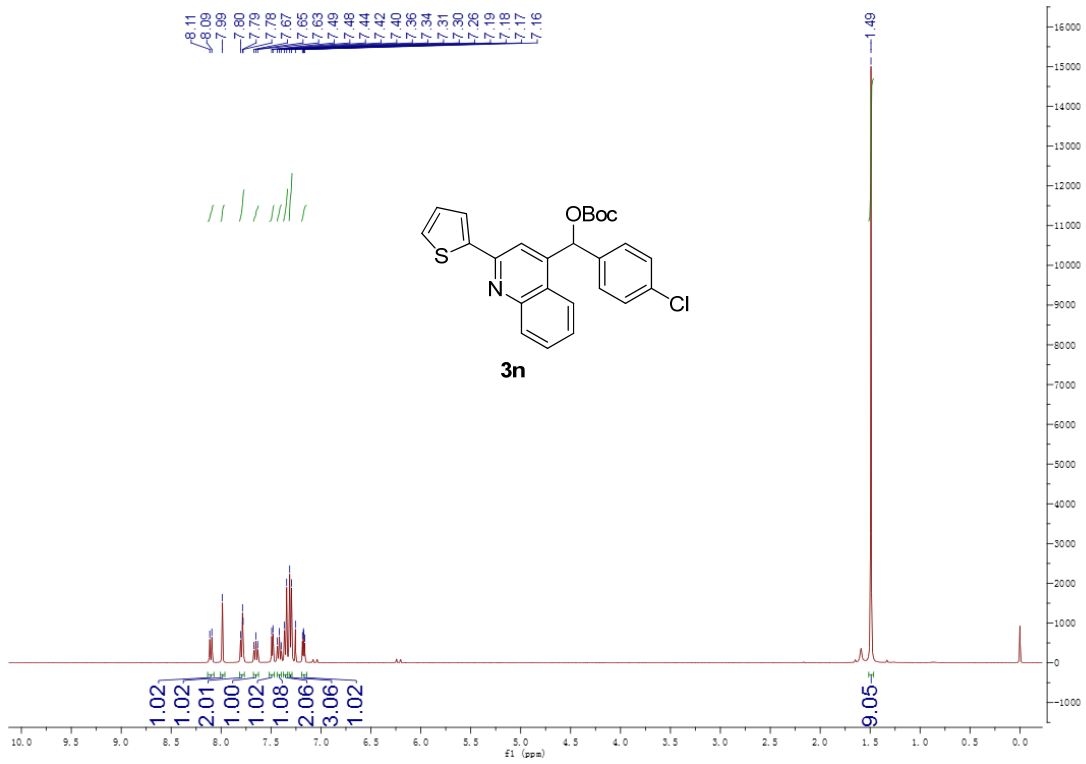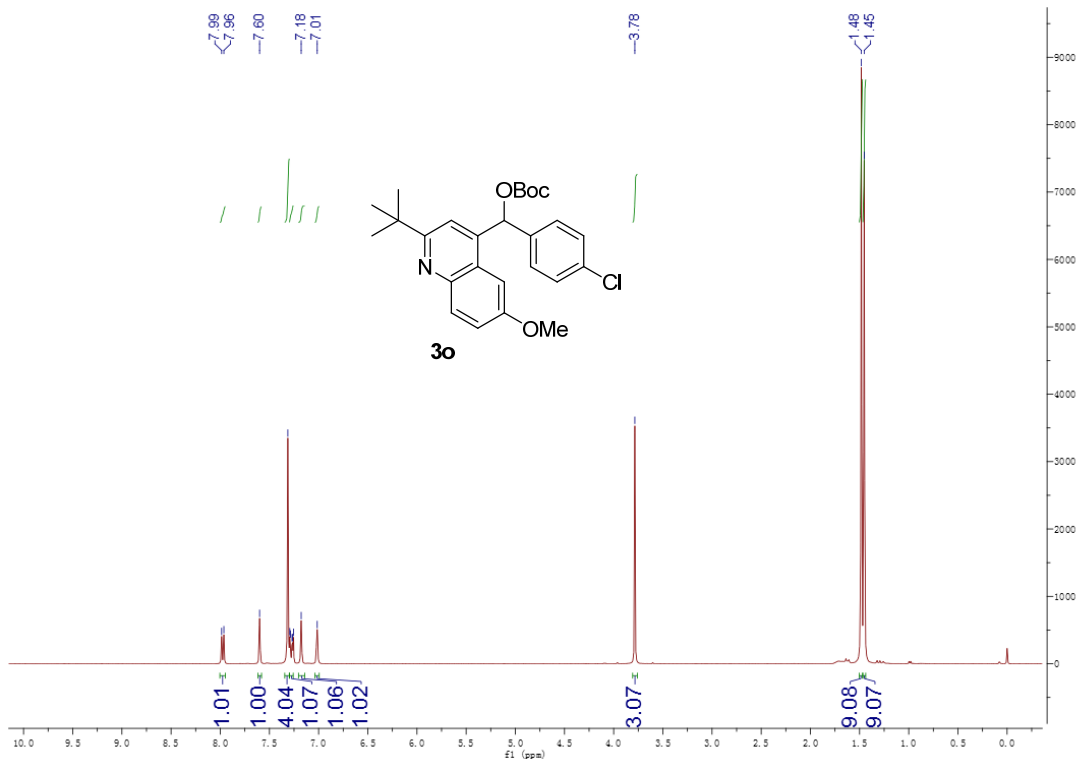

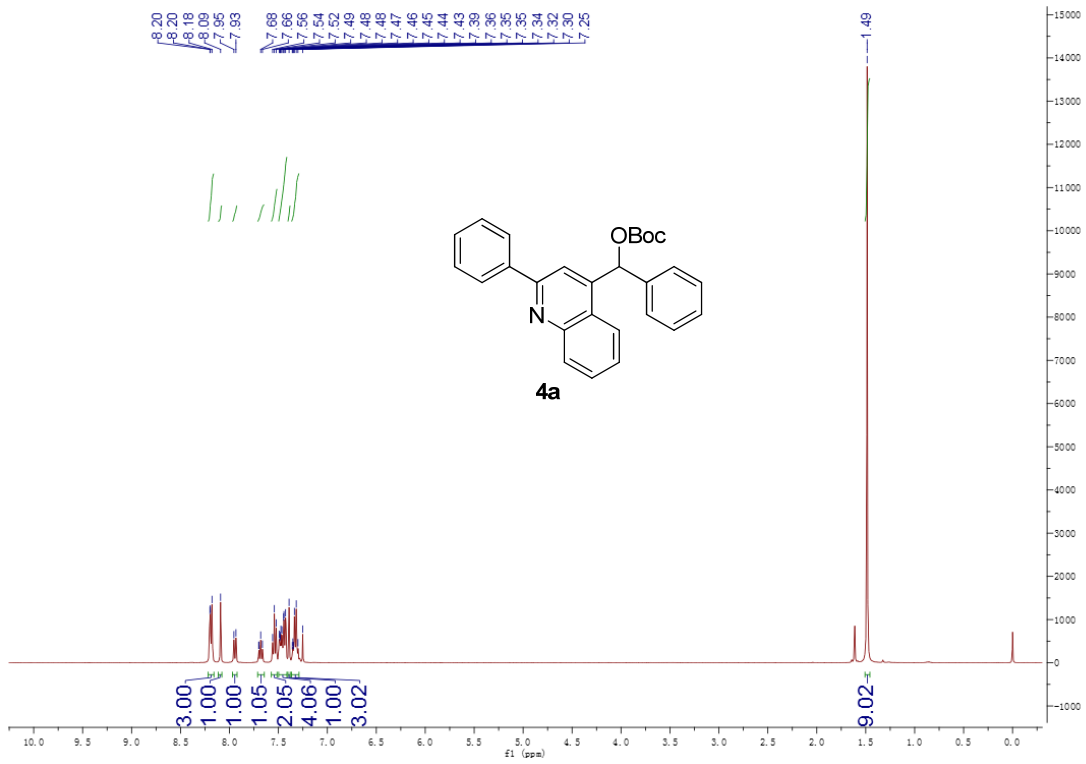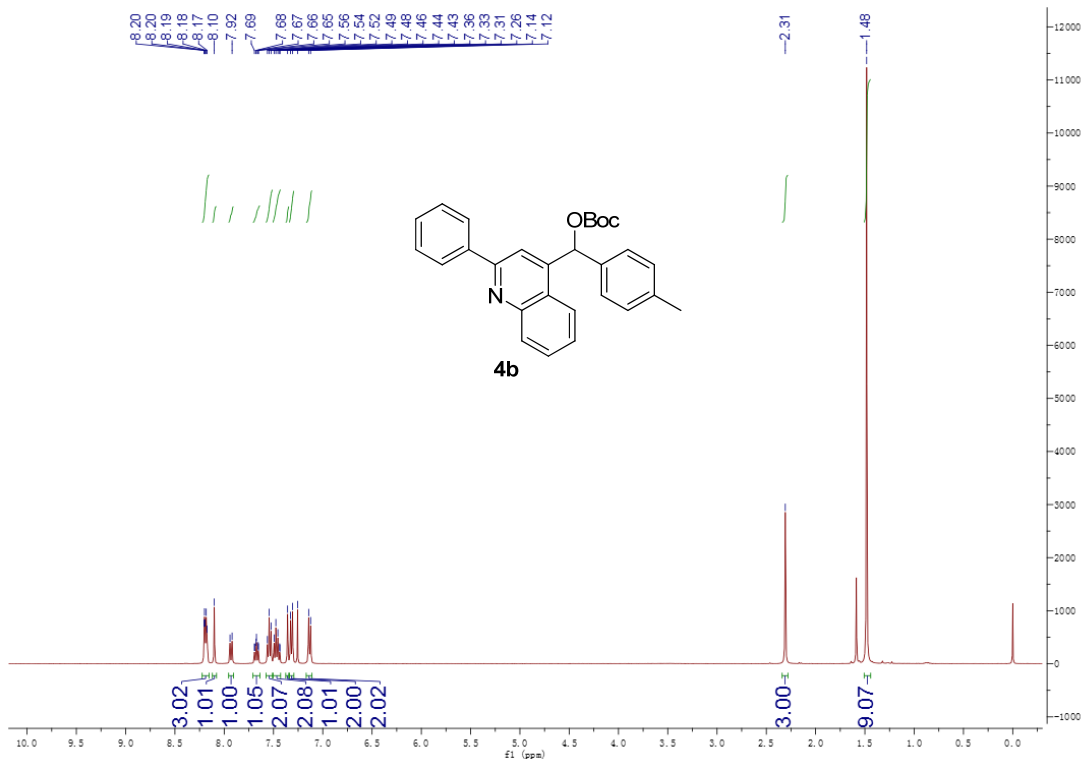

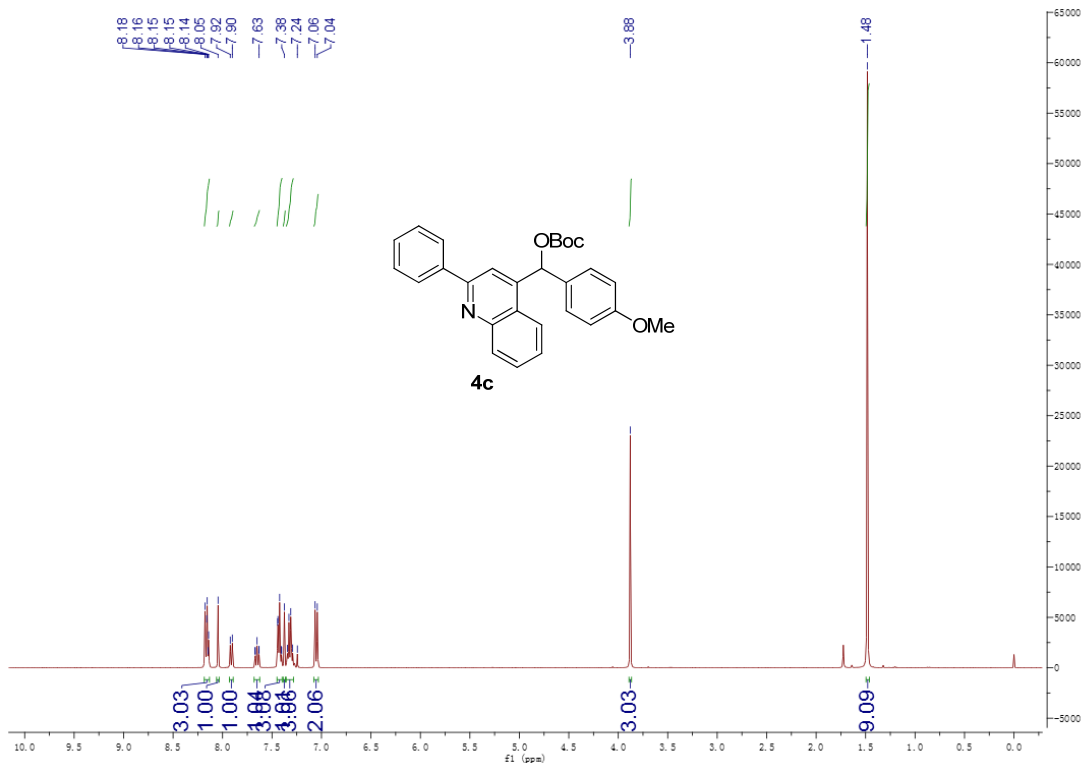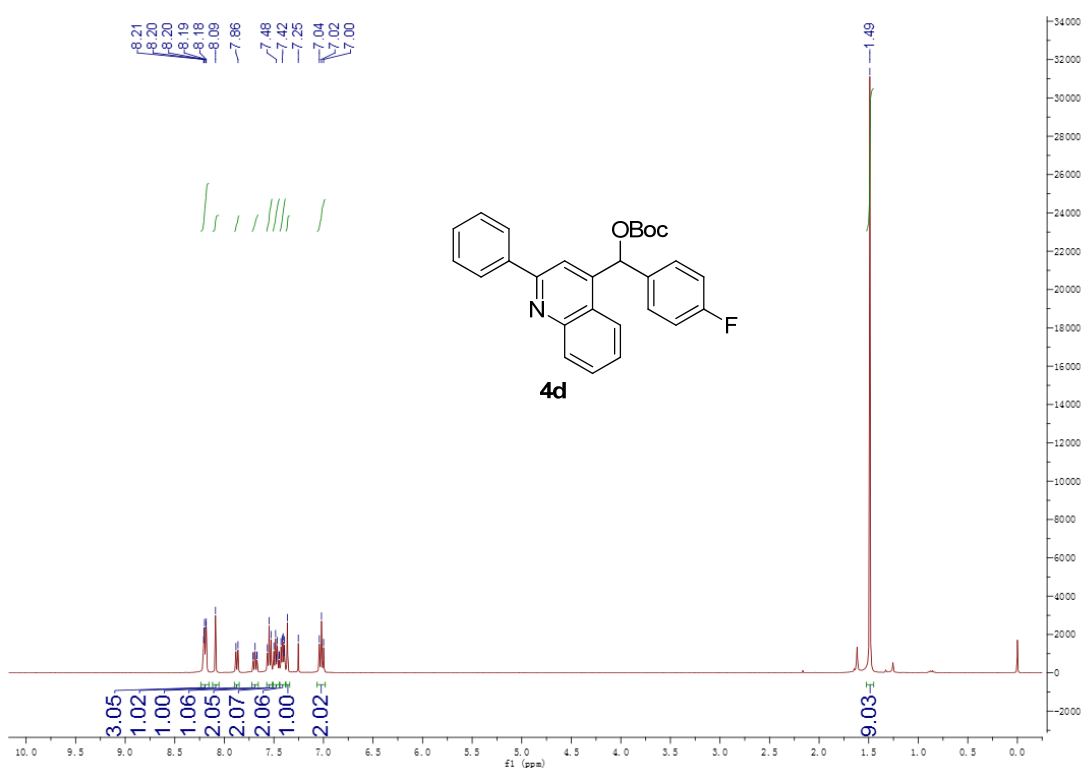

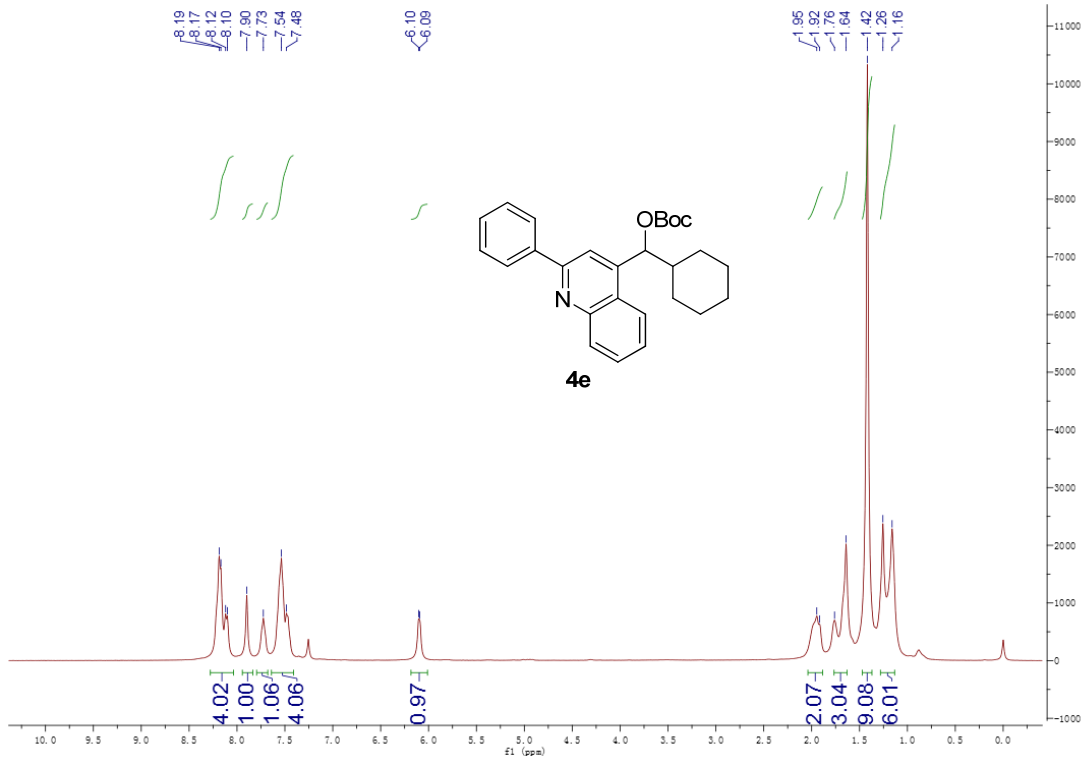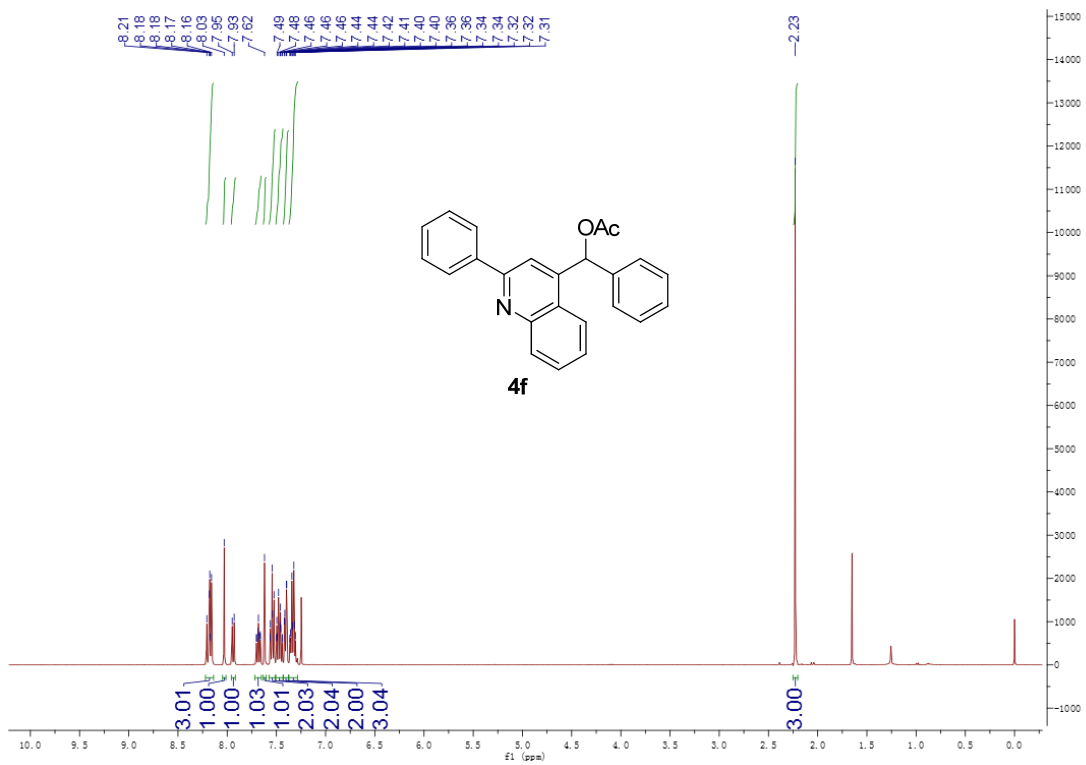

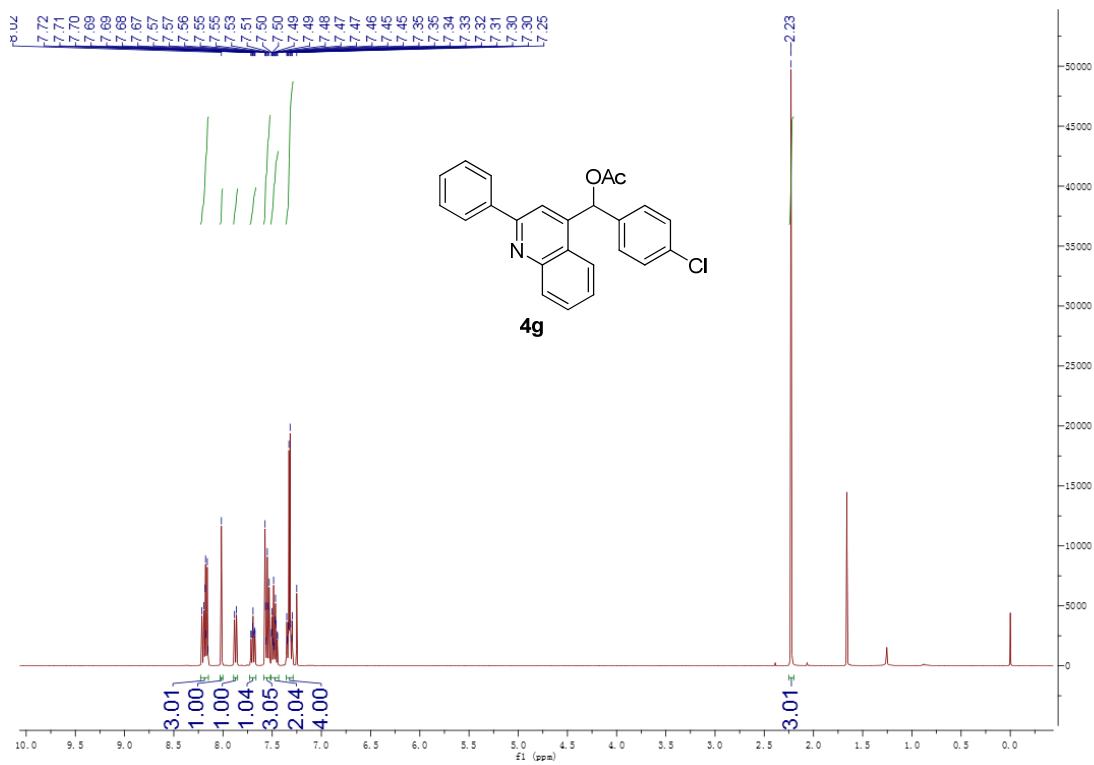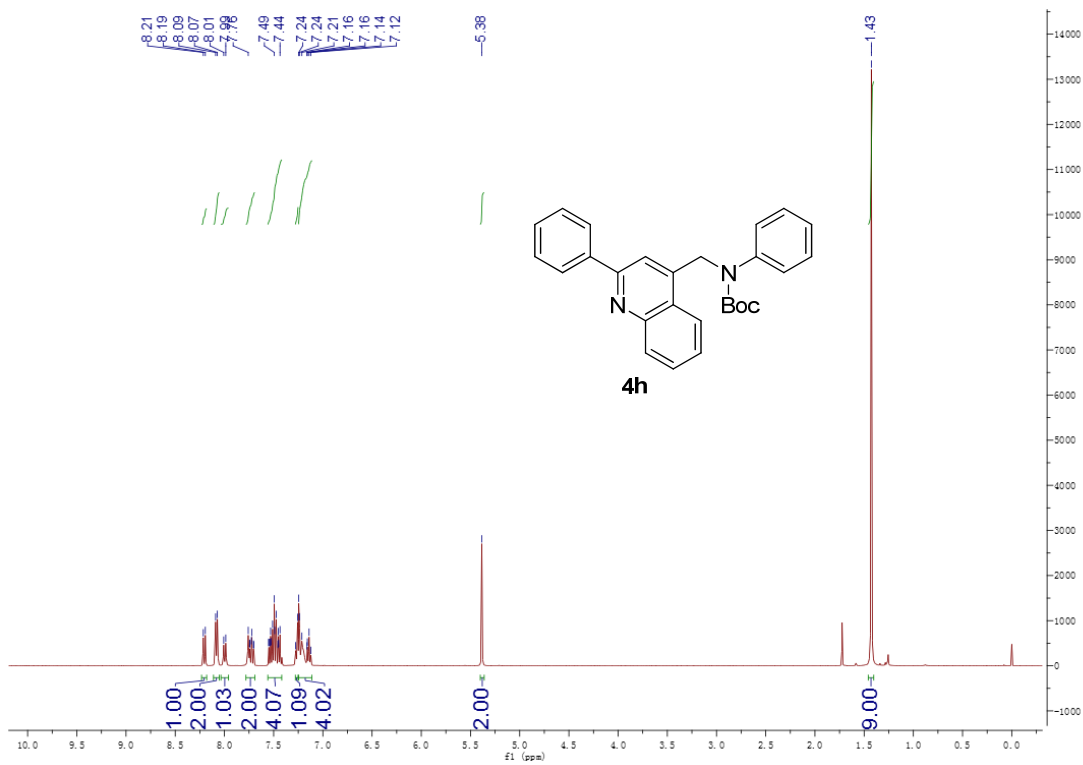

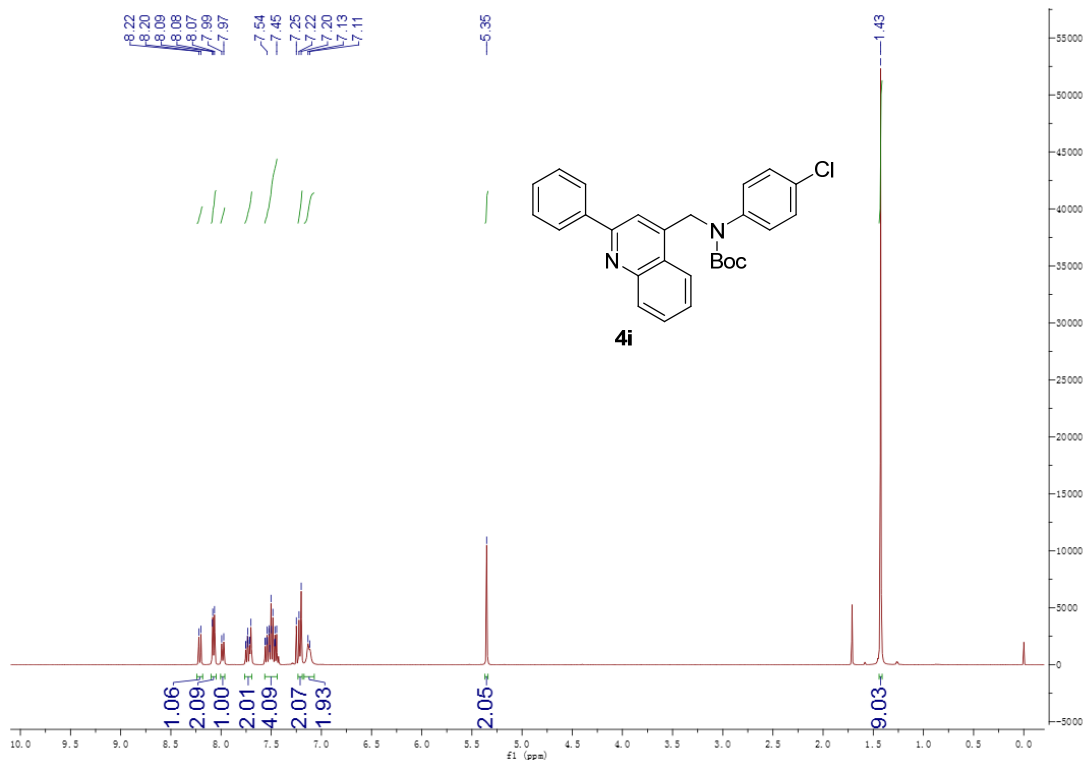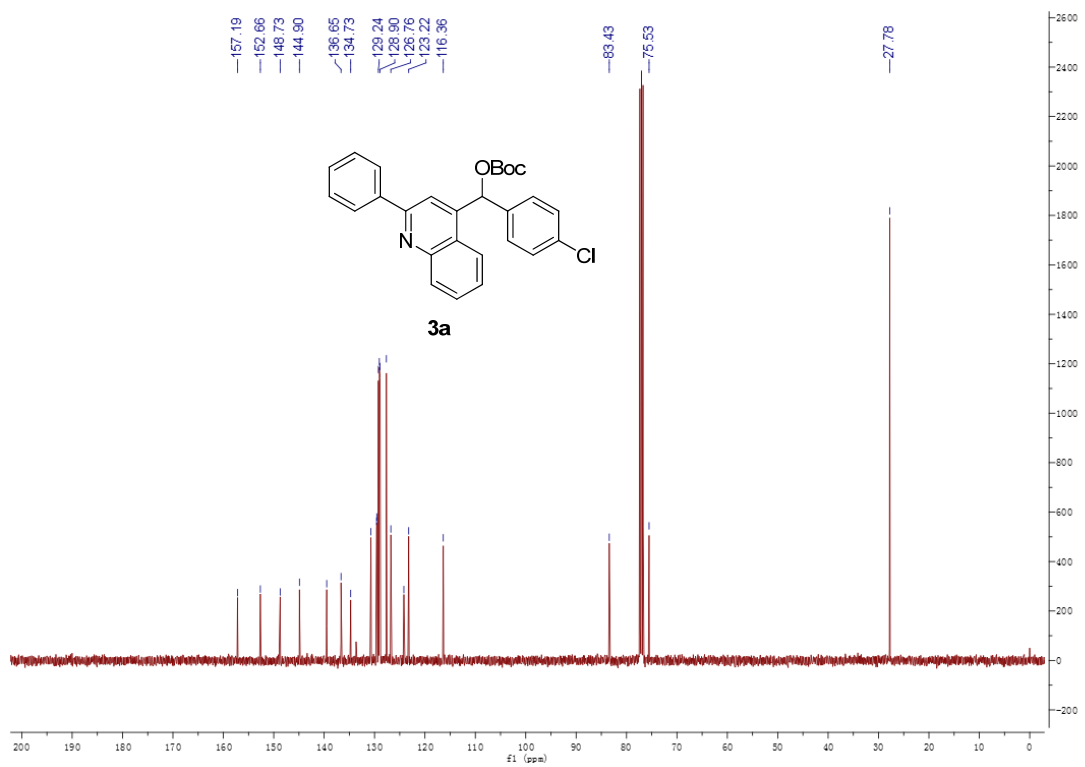



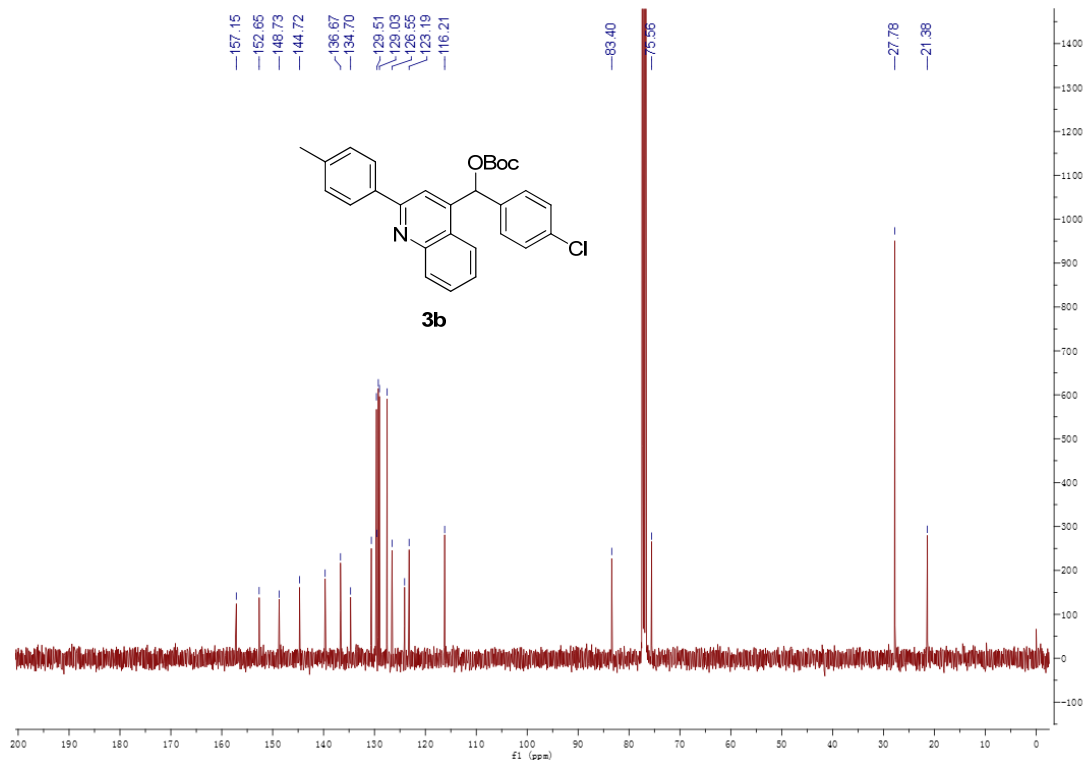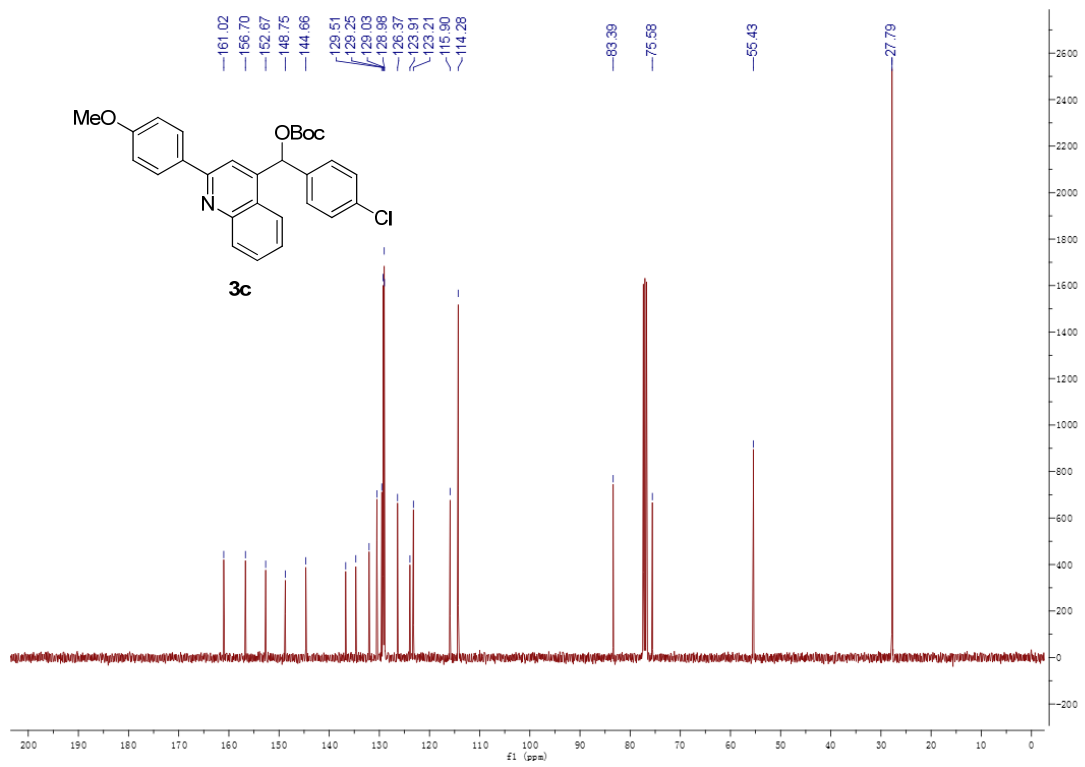

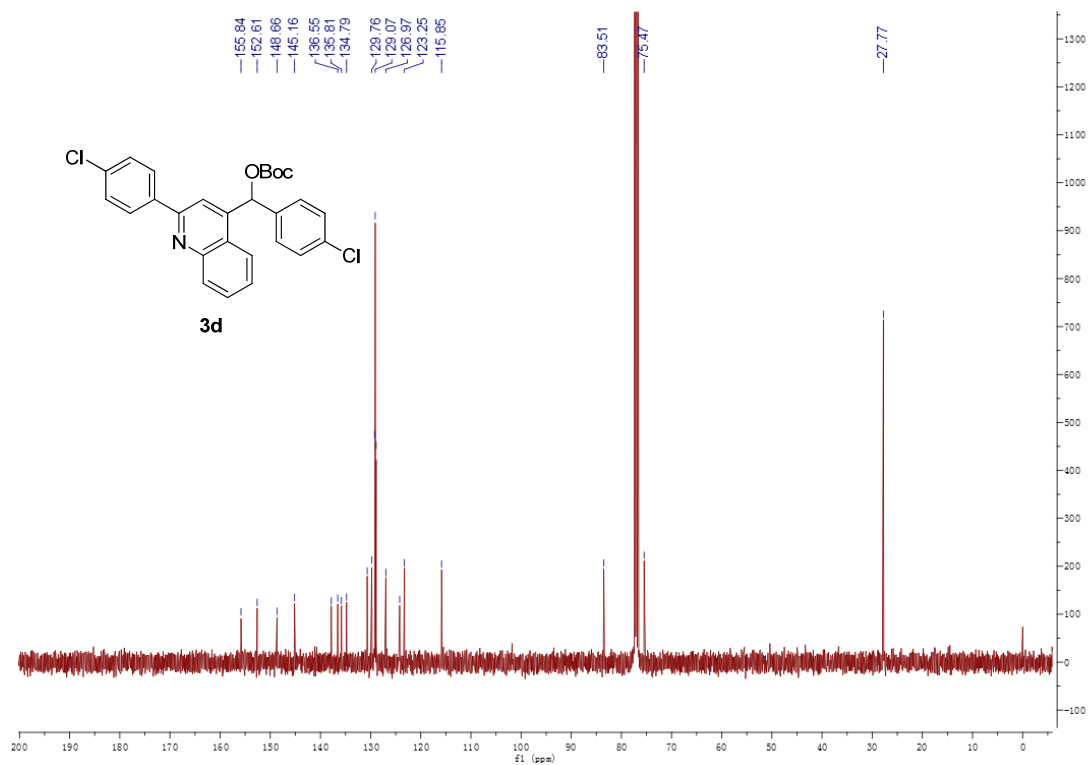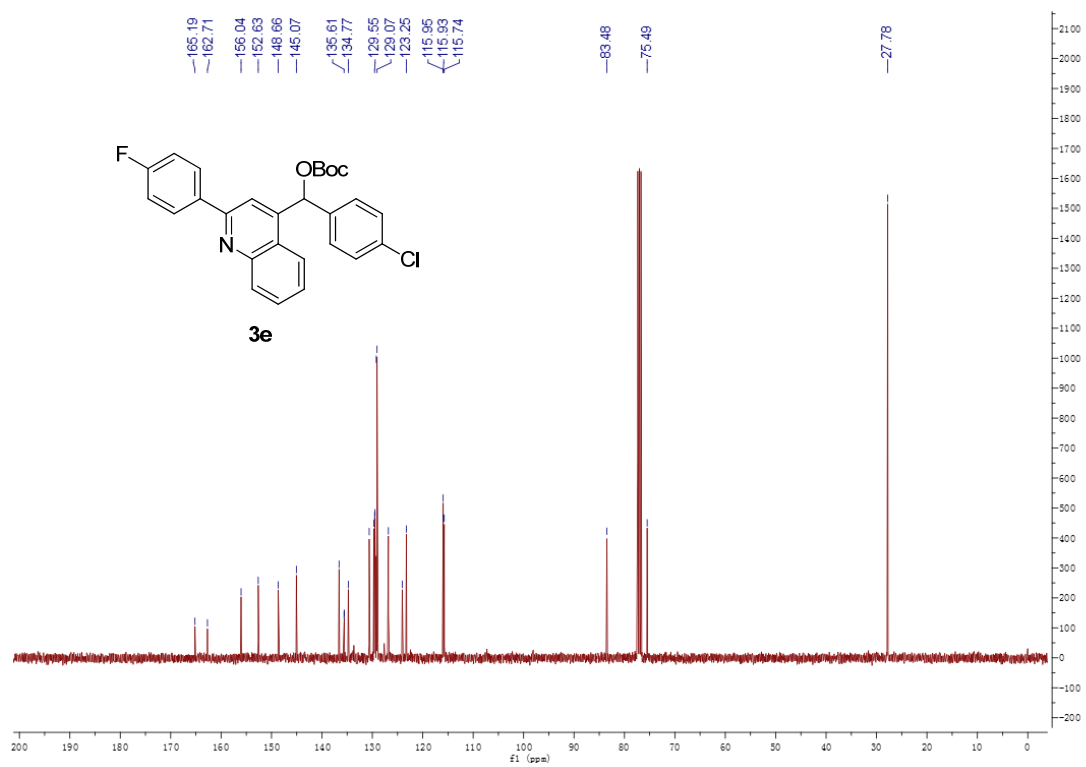

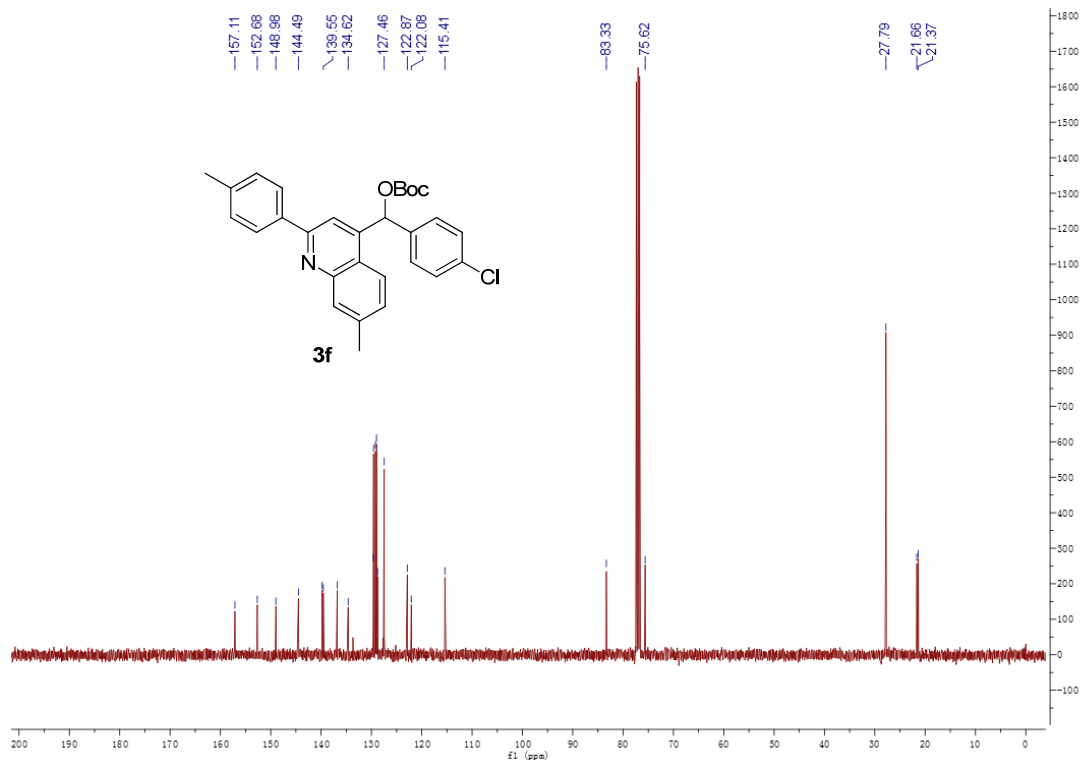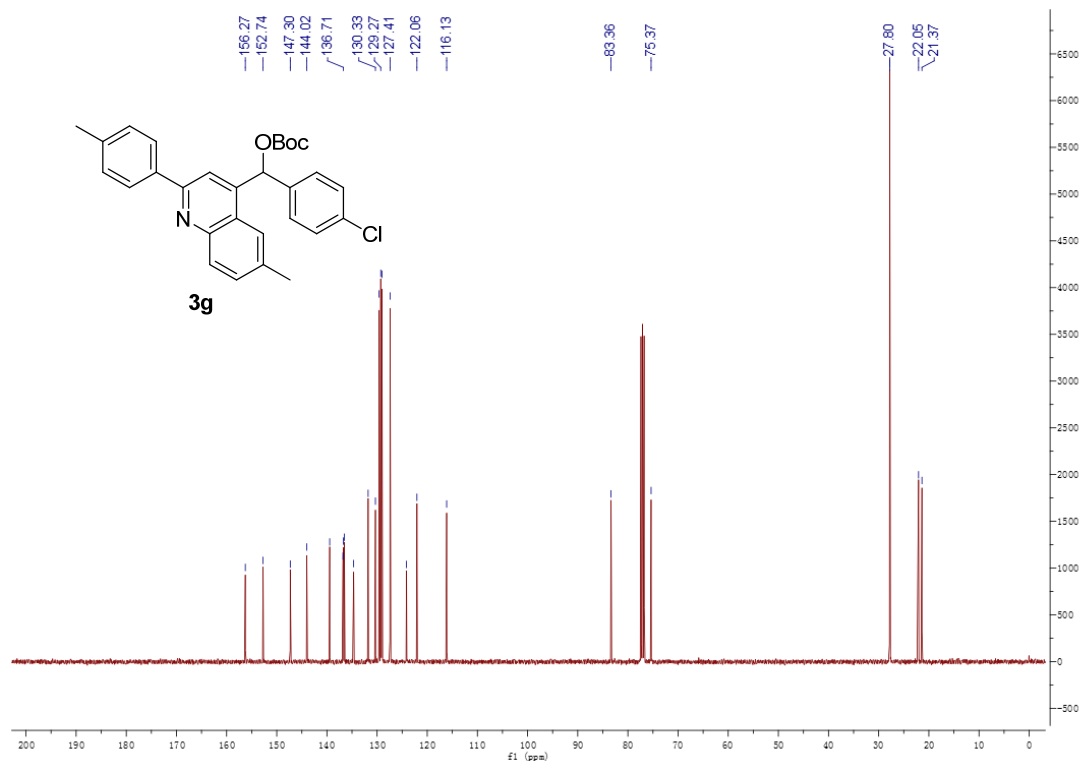

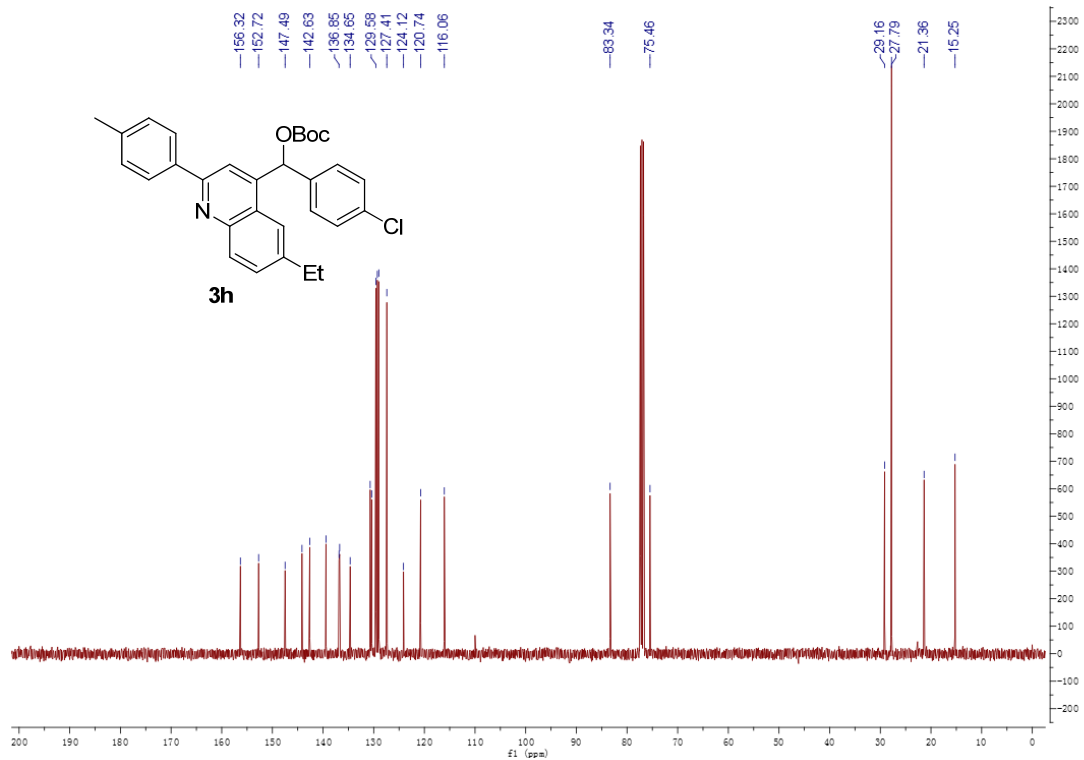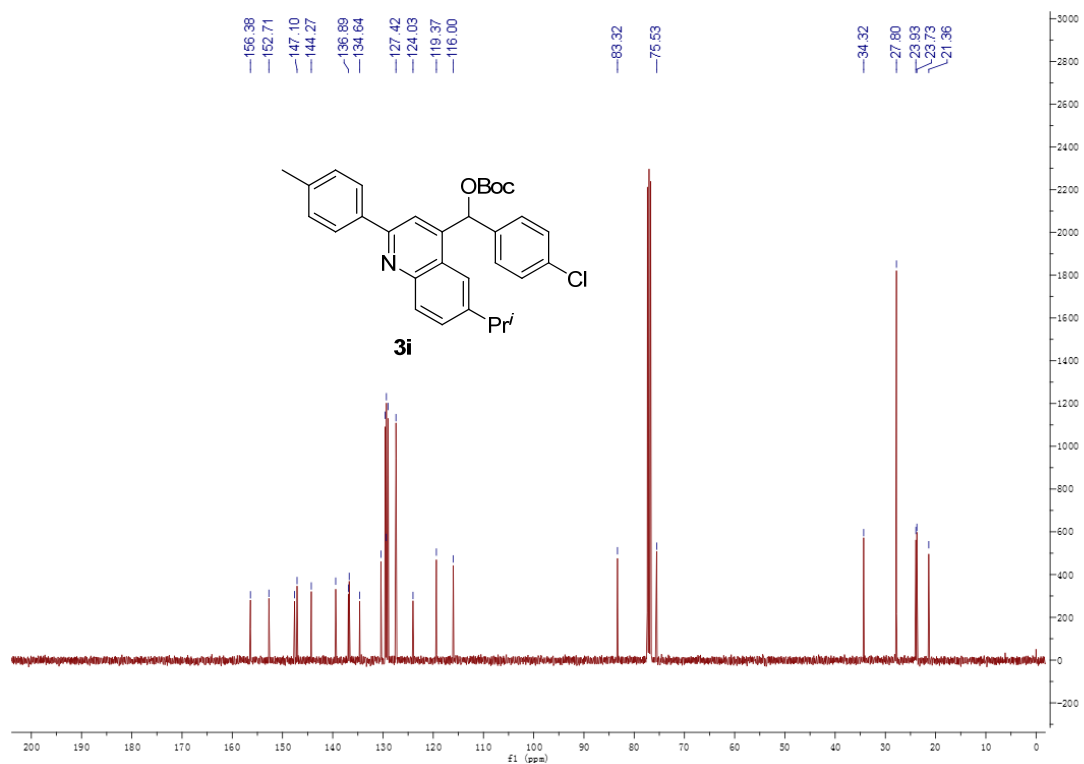

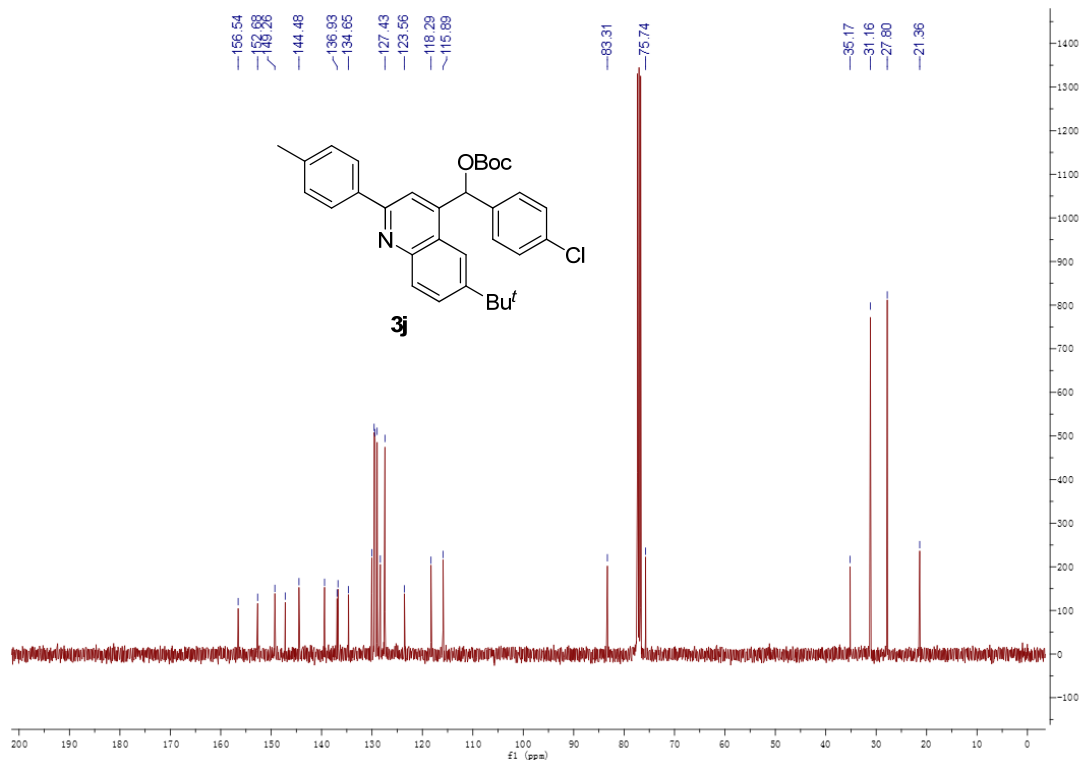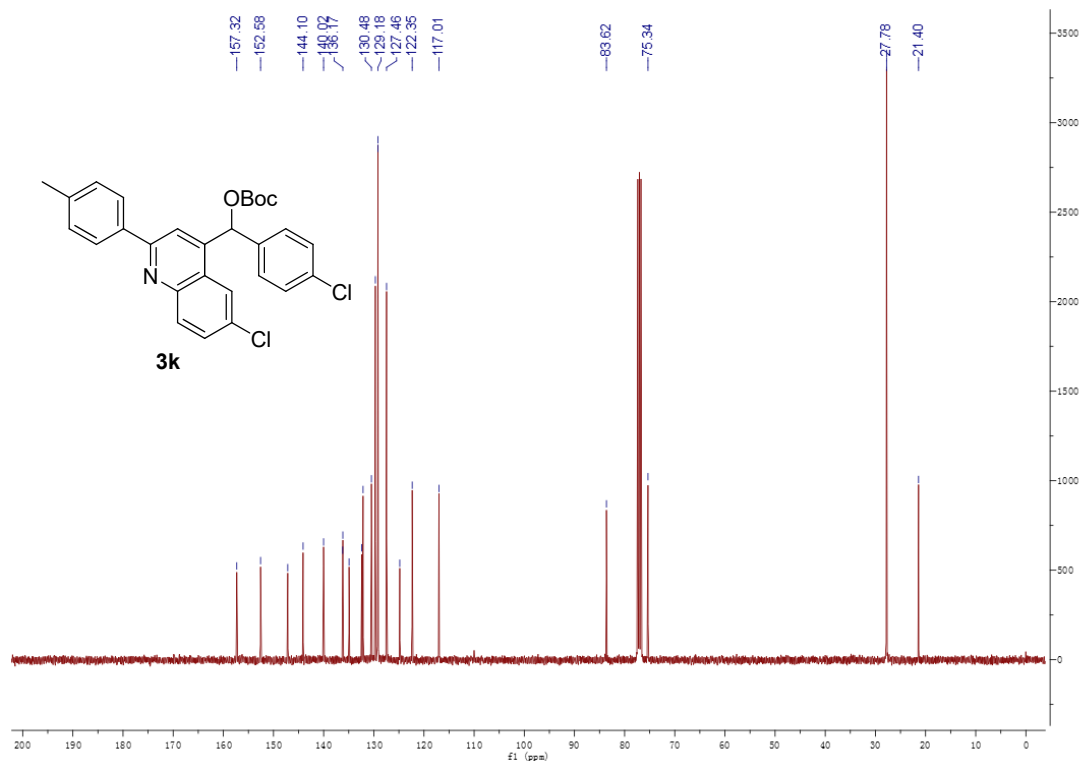

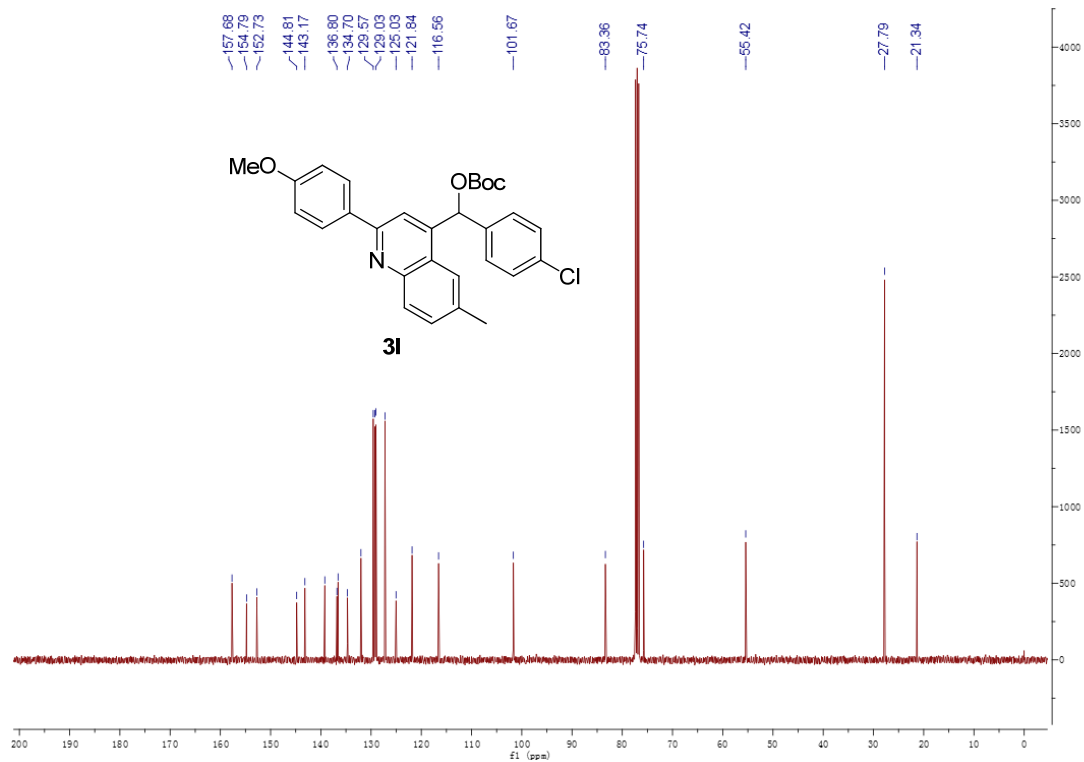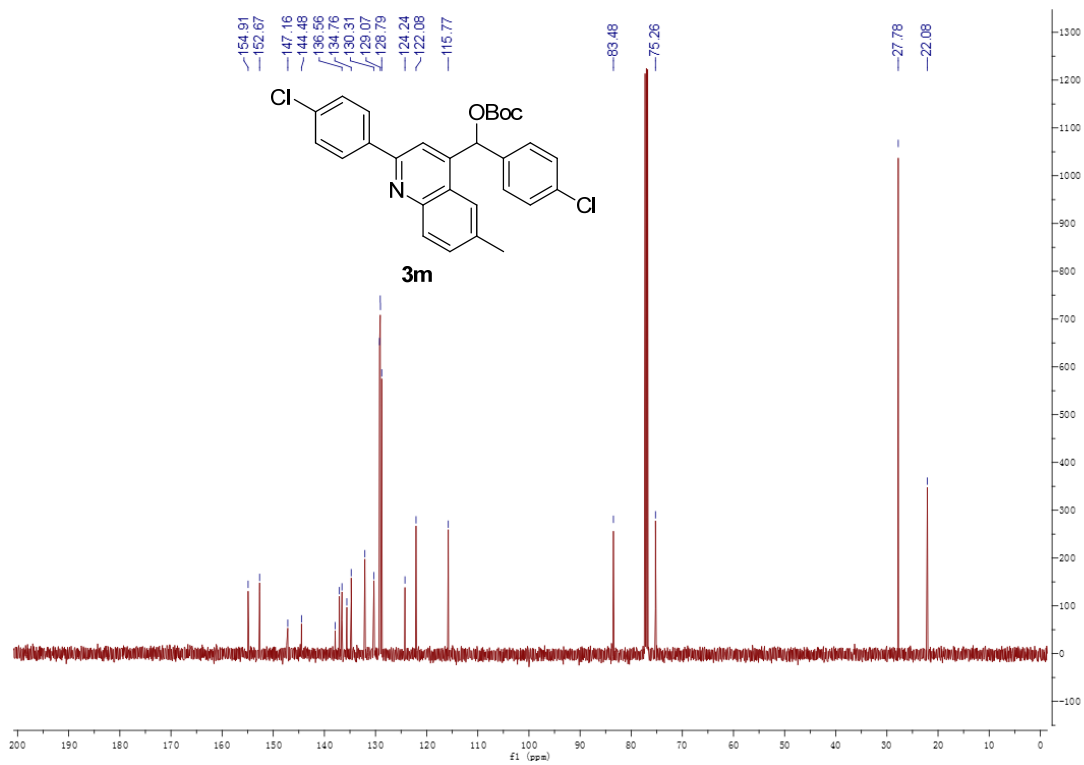

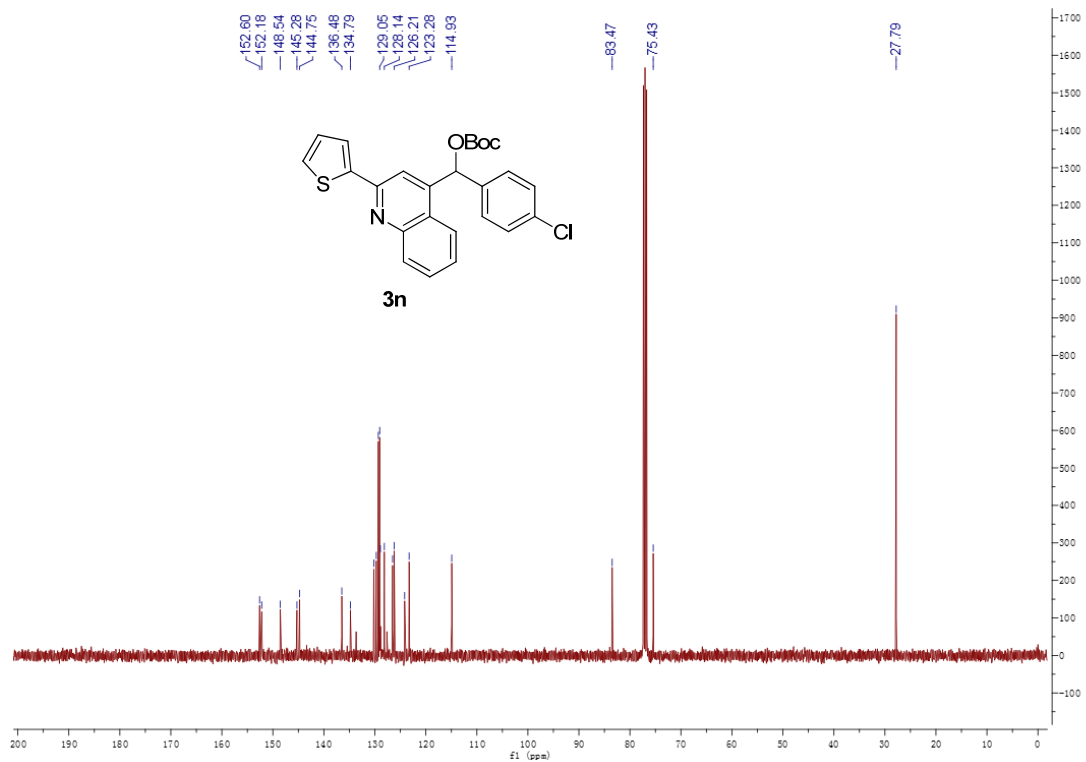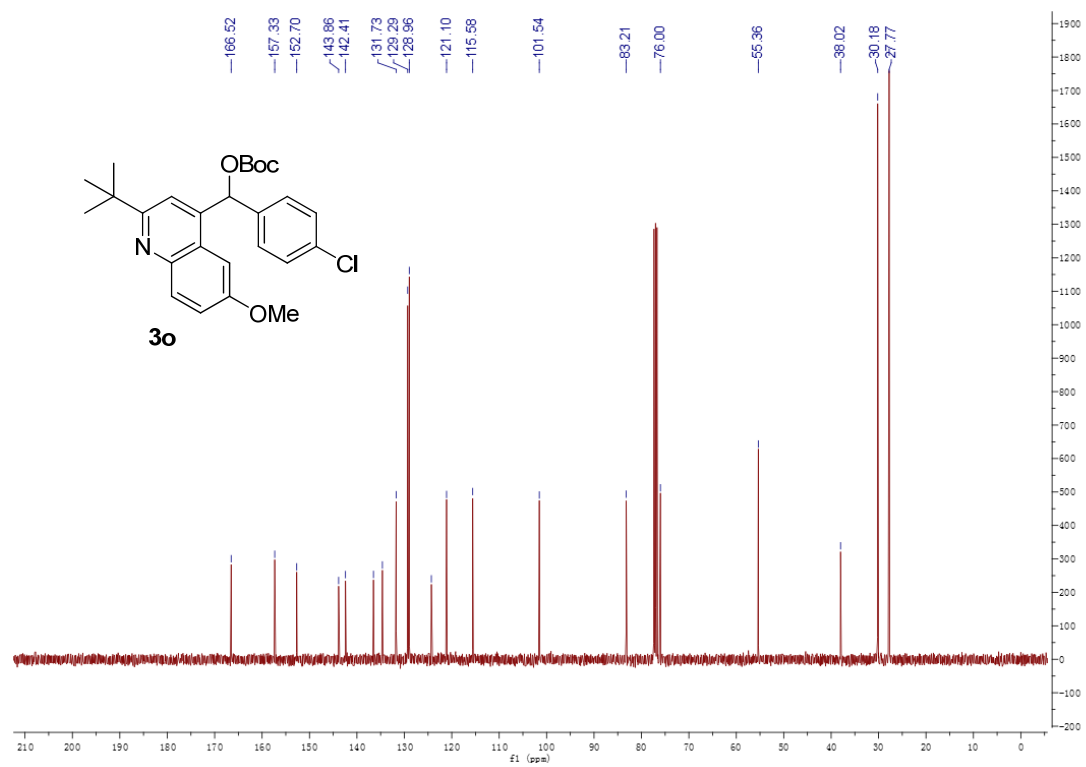

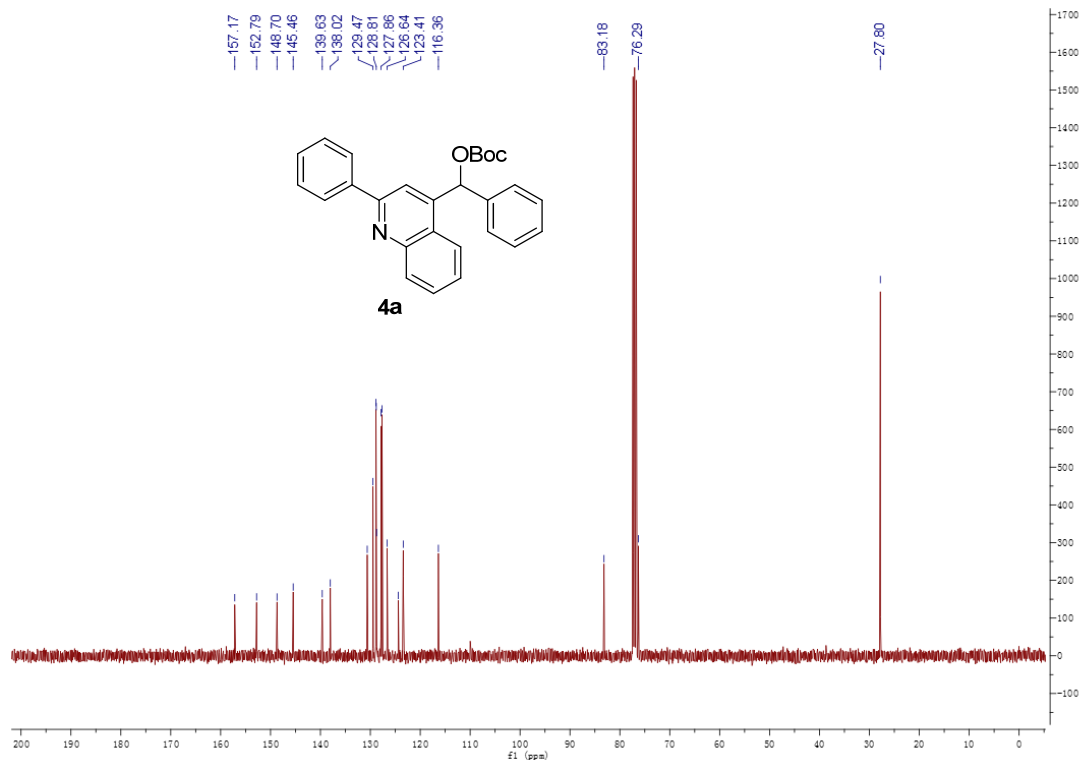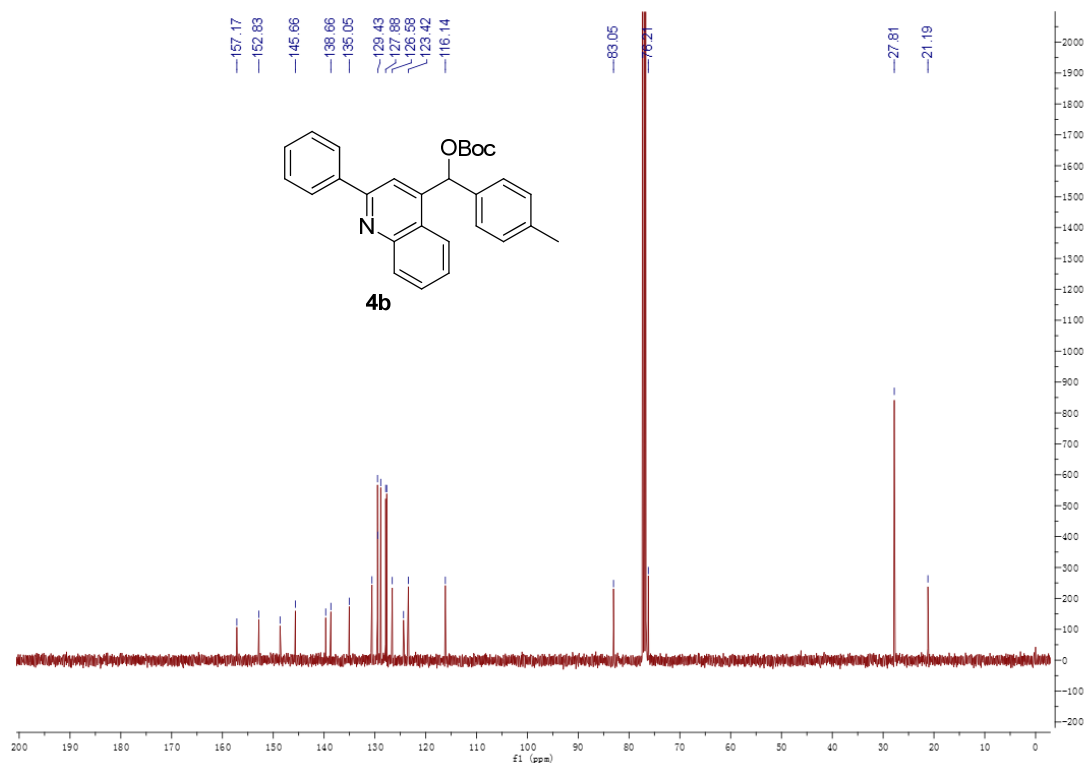



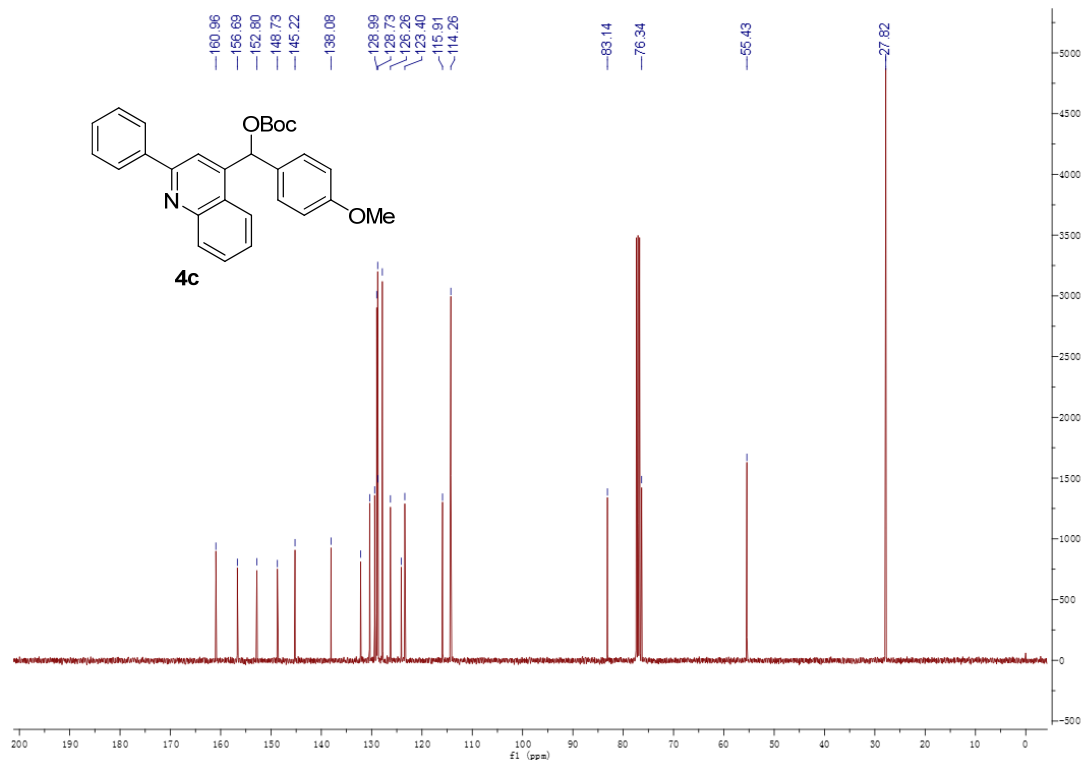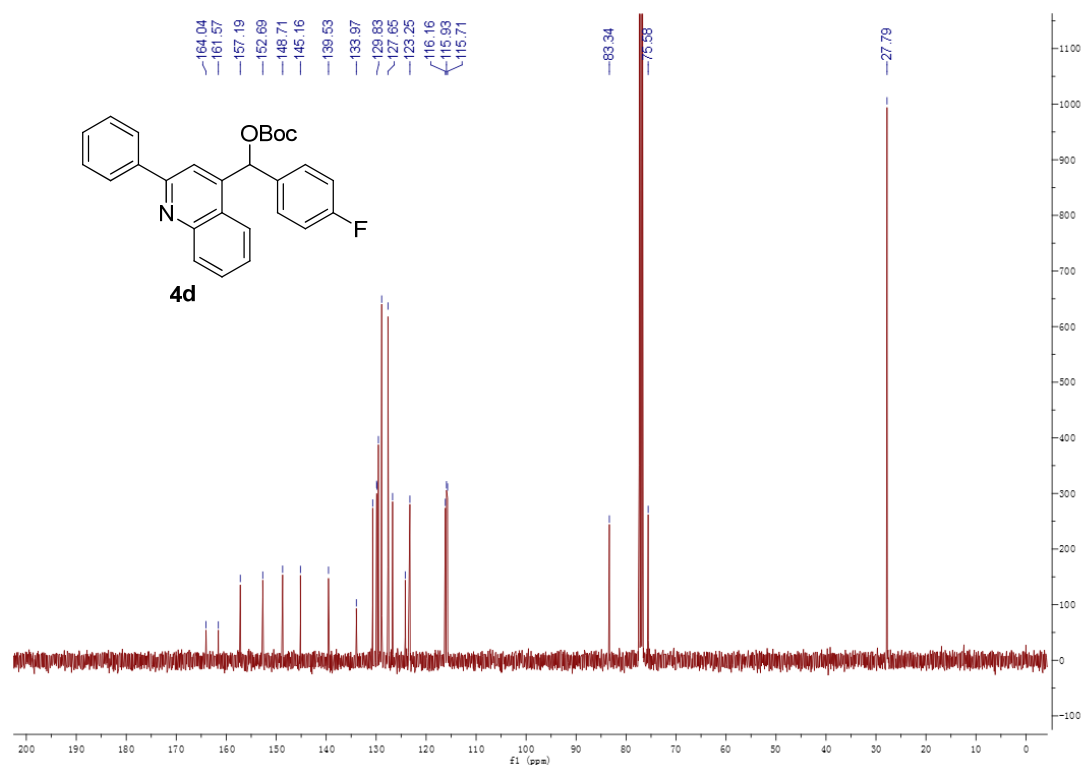

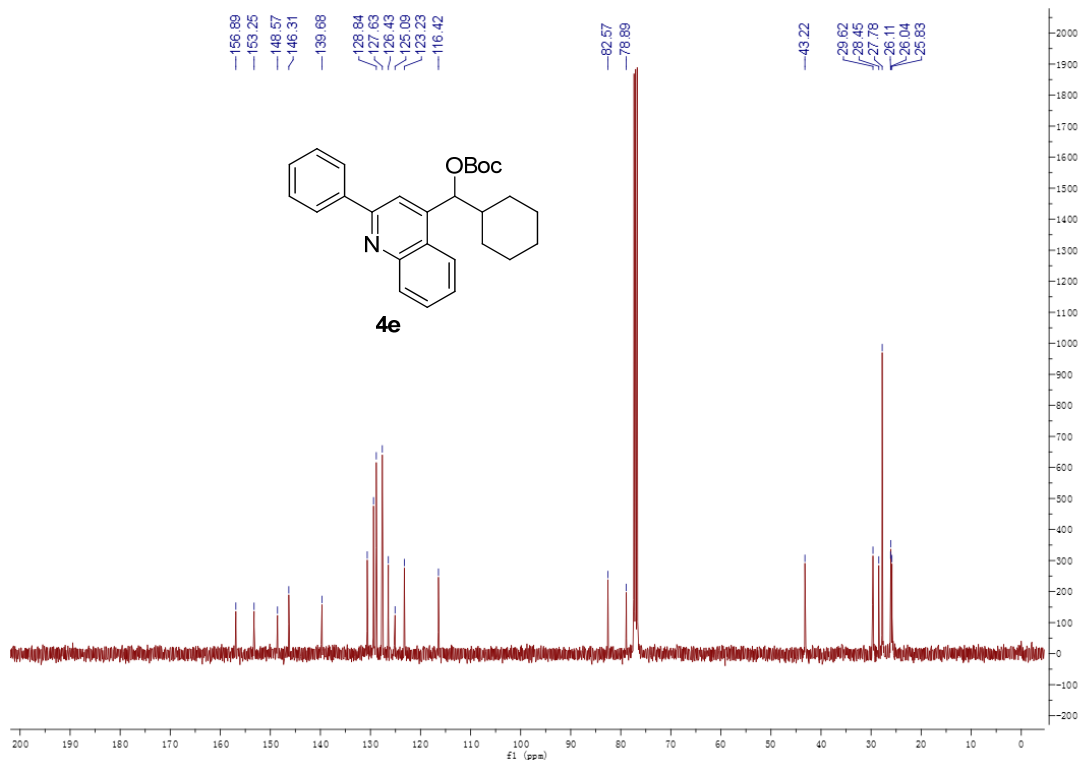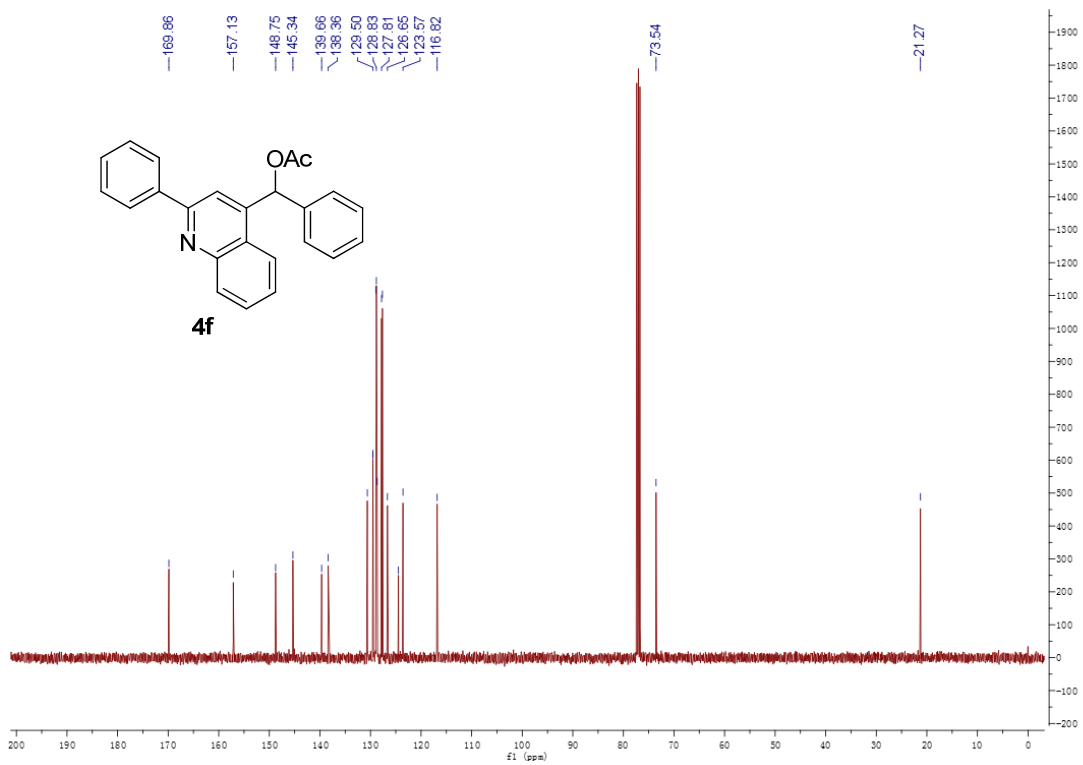

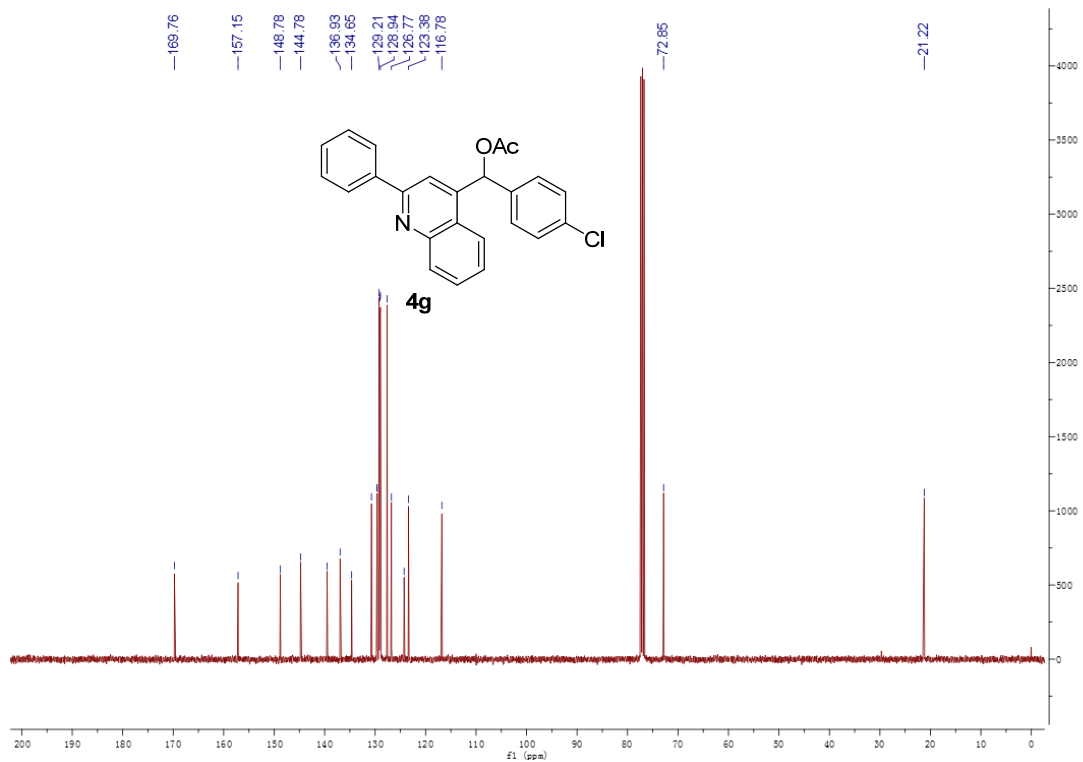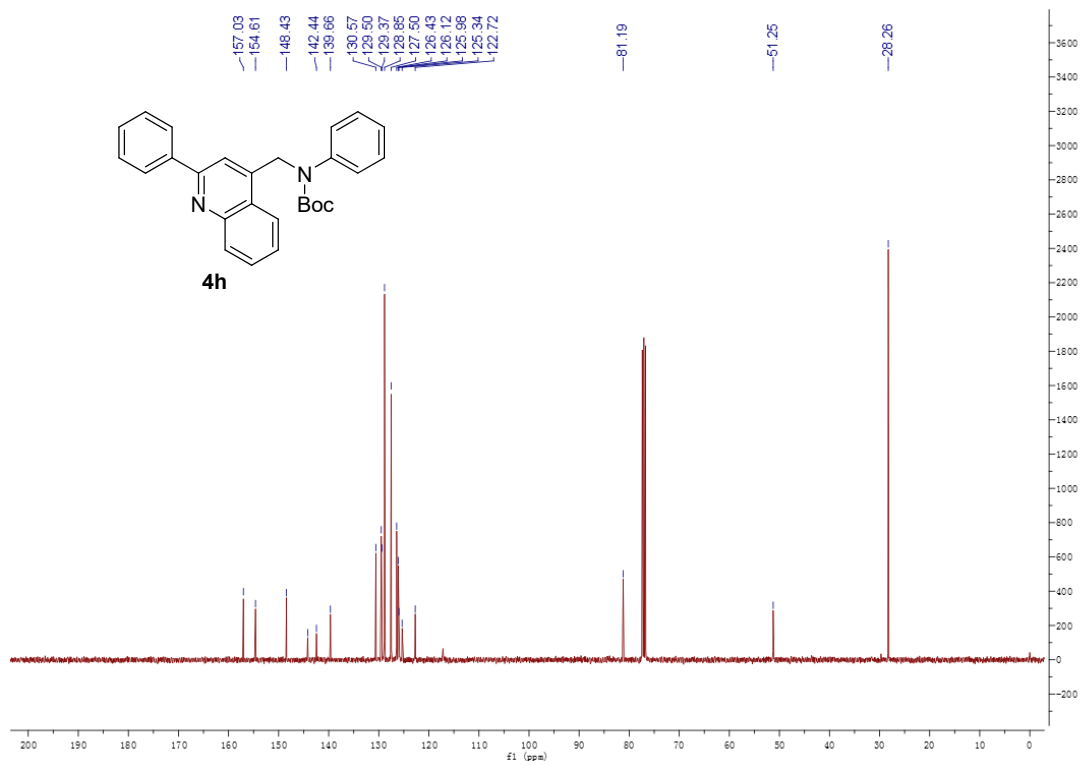

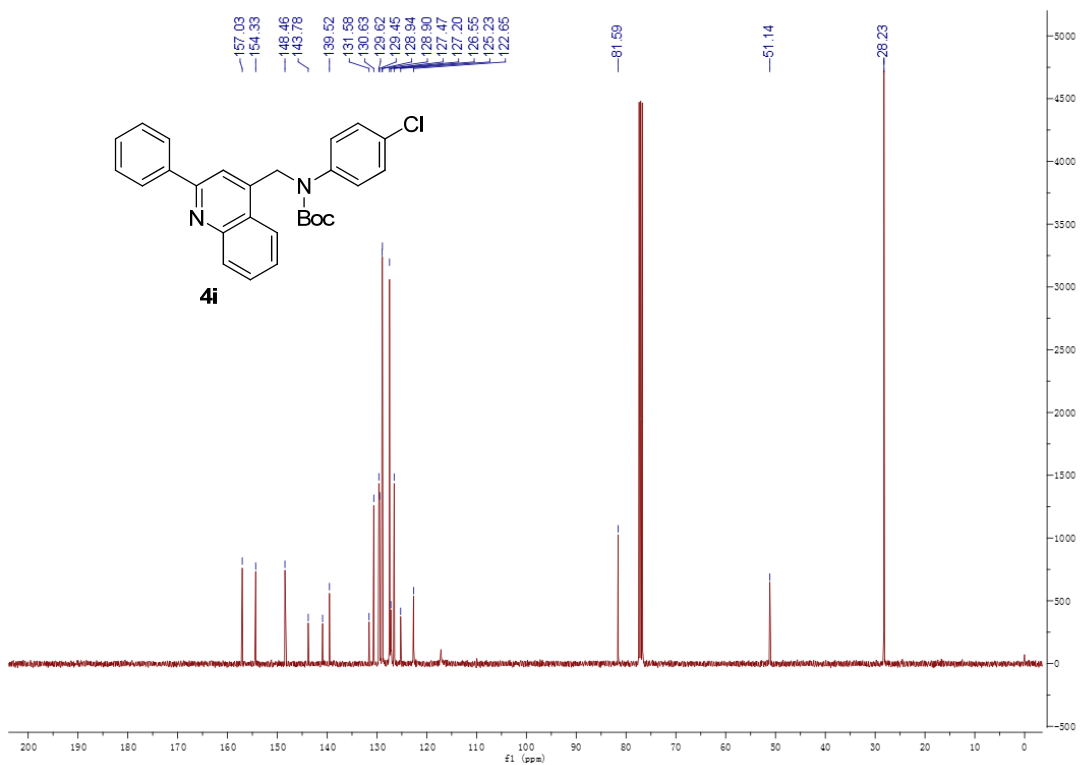

Supplement: c8ob02078g1.pdf [file c8ob02078g1.pdf]
